# Genotype combinations drive variability in the microbiome configuration of the rhizosphere of Maize/Bean intercropping system

Giovanna Lanzavecchia<sup>1</sup>, Giulia Frascarelli<sup>1</sup>, Lorenzo Rocchetti<sup>1</sup>, Elisa Bellucci<sup>1</sup>, Elena Bitocchi<sup>1</sup>, Valerio Di Vittori<sup>1</sup>, Fabiano Sillo<sup>2</sup>, Irene Ferraris<sup>3</sup>, Giada Carta<sup>3</sup>, Massimo Delledonne<sup>3</sup>, Laura Nanni<sup>1,\*</sup> and Roberto Papa<sup>1,\*</sup>

<sup>1</sup> Department of Agricultural, Food and Environmental Sciences, Marche Polytechnic University, 60131 Ancona, Italy; [g.lanzavecchia@staff.univpm.it](mailto:g.lanzavecchia@staff.univpm.it) (G.L.); [g.frascarelli@pm.univpm.it](mailto:g.frascarelli@pm.univpm.it) (G.F.); [lorenzo.rocchetti@staff.univpm.it](mailto:lorenzo.rocchetti@staff.univpm.it) (L.R.); [e.bellucci@staff.univpm.it](mailto:e.bellucci@staff.univpm.it) (E.B.); [e.bitocchi@staff.univpm.it](mailto:e.bitocchi@staff.univpm.it) (E.B.); [v.divittori@staff.univpm.it](mailto:v.divittori@staff.univpm.it) (V.D.V.)

<sup>2</sup> National Research Council of Italy, Institute for Sustainable Plant, Strada delle Cacce 73, 10135 Torino, Italy; [fabiano.sillo@ips.cnr.it](mailto:fabiano.sillo@ips.cnr.it) (F.S.)

<sup>3</sup> Department of Biotechnologies, Strada le Grazie 15, 37134 Verona Italy; [irene.ferraris@univr.it](mailto:irene.ferraris@univr.it) (I.F.); [giada.carta@univr.it](mailto:giada.carta@univr.it) (G.C.); [massimo.delledonne@univr.it](mailto:massimo.delledonne@univr.it) (M.D.)

\* Correspondence: [l.nanni@staff.univpm.it](mailto:l.nanni@staff.univpm.it) (L.N.); [r.papa@staff.univpm.it](mailto:r.papa@staff.univpm.it) (R.P.)

**Abstract:** In intercropping system, the interplay between cereals and legumes, which is strongly driven by complementarity of below-ground structures and their interactions with the soil microbiome, raises a fundamental query: Can different genotypes alter the configuration of the rhizosphere microbial communities? To address this issue, we conducted a field study, probing the effects of intercropping and diverse maize (*Zea mays* L.) and beans (*Phaseolus vulgaris* L., *Phaseolus coccineus* L.) genotype combinations. Our results unveil that intercropping condition alters the rhizosphere bacterial communities, but that the degree of this impact is substantially affected by specific genotype combinations. Overall, intercropping allows the recruitment of exclusive bacterial species and enhance community complexity. Nevertheless, combinations of maize and beans genotypes determine two distinct groups characterized by higher or lower bacterial community diversity and complexity, which are influenced by the specific bean line associated. Moreover, intercropped maize lines exhibit varying propensities in recruiting bacterial members with more responsive lines showing preferential interactions with specific microorganisms. Our study conclusively shows that genotype has an impact on the rhizosphere microbiome and that a careful selection of genotype combinations for both species involved is essential to achieve compatibility optimization in intercropping.

**Keywords:** *Zea Mais* L.; *Phaseolus* spp., high throughput sequencing, 16S region, bacterial community, metagenomics; rhizosphere, intercropping

## 1. Introduction

Intercropping, i.e., the simultaneous cultivation of different plant species on the same field is a promising way to diversify crops [1] and to promote sustainable agriculture [2, 3]. This approach offers multiple ecological services [4, 5, 6], including enriched biodiversity [7], improved resource efficiency and enhanced soil health [8]. It optimizes nutrient cycling, conserves water, and increases resilience to environmental challenges. Evidence also indicates a positive correlation between greater plant diversity and increased microbial abundance, diversity, and soil carbon sequestration [9, 10].

In particular, legume intercropping is a promising way to eco-intensify the production of cropping systems [4, 5, 6] and can be used to enrich soil with biologically fixed N due to legume-rhizobia symbiosis, thereby improving the soil quality [11]. In addition, the mixture of two or more crop species like cereals and legumes having different root systems and rhizosphere activities often generates better cover and efficient soil exploration for better resource uptake [12]. However, challenges in promoting intercropping adoption exist. These challenges include scarce breeding efforts and limited availability of genomic tools. Such tools are essential for optimizing legume adaptation to intercropping, dissecting the dynamics of the interaction, and understanding their effects on the different genotype combinations used in the intercropping system [13, 14].

Selection of varieties that can efficiently exploit the benefits of co-cultivation remains a technical limit to dissemination in agricultural systems [15].

Encouraging the adoption of intercropping, it is imperative to develop indicators to measure the delivery of ecological services. Typically, benefits are assessed using conventional metrics like crop yield or resource-use efficiency, but less attention has been given to mechanisms involved in soil health. Nevertheless, belowground interactions play a crucial role in shaping facilitative processes [11, 16, 17, 18, 19, 20]. Intercropping favors the development of different types of roots and changes overall root distribution and architecture, as well as exudation processes in the rhizosphere [21]. Consequently, intercropping will influence both the extent and nature of the relationships between plants and microorganisms, thereby enabling new beneficial interactions [1]. More broadly, it has been postulated that the rhizosphere microbiota may underlie the added value of intercropping [22]. Evidence suggests that the influence of root systems on microbial communities, known as the "rhizosphere effect", is exerted both at species that at genotype level, as observed in maize, soybean, and alfalfa [23, 24, 25, 26, 27, 28]. The species-specific effect has been observed in intercropping systems as well. Indeed, various studies on cereal/legume intercropping systems have documented shifts in microbial communities influenced by the choice of co-cultivated species [29, 30, 31]. These studies have observed changes in the abundance of bacteria belonging to specific phyla, with some increasing or decreasing either in cereals or legumes. However, even when these studies shared the same plant species combined in intercropping, the reported microbial changes have exhibited deep variability from one study to another. This suggests that, in addition to crop species, the choice of crop genotypes may play a role in influencing the microbial composition, further supporting the idea of a genotype-specific effect on rhizosphere communities. Furthermore, recent findings highlighting different responses in the root bacterial communities of two sugarcane varieties intercropped with soybean [32] and variations in community structures between different varieties of wheat and pea in intercropping [22] further validate the hypothesis of a genotype-driven impact on the microbiome in intercropping scenarios.

These studies emphasize the challenge of establishing universal relationships between plants and microorganisms and the increased complexity of characterizing microbial communities in intercropping systems [33]. Given the highly specific nature of plant-soil microorganism relationships, our study, which aims to investigate the maize (*Zea mays* L.) / bean (*Phaseolus vulgaris* L. and *Phaseolus coccineus* L.) intercropping system, incorporates two primary considerations based on the aforementioned observations. Firstly, observing microbiome variations in intercropping by focusing on individual plant lines may yield limited or overly specific insights. Conversely, identifying common patterns across multiple varieties grown in intercropping can reveal more reliable trends. Secondly, examining microbiome profiles in different intercropping combinations can determine whether a universal trend exists or if it varies with the selection of co-cultivated genotypes, shedding light on genotype-specific effects on microbial recruitment and their direct involvement in intercropping system. For this scope, we applied a comprehensive blind approach to characterize and compare the rhizosphere microbiome of various maize and bean lines cultivated in sole crop (SC) and in intercropping (IC) combinations. Diversity, composition, and structure of bacterial communities were characterized by high throughput sequencing of 16S rRNA genes and results are discussed in the impact of IC as a whole and of various IC combinations.

## 2. Results

### 2.1 Composition of the bacterial community in the rhizosphere of maize / bean intercropping system.

Plant status (maize in SC; beans in SC; maize/bean IC) has a significant effect on Chao1 and Shannon diversity indexes ( $p$  value < 0.05) (Table S2). Beans in SC show a significantly lower bacterial diversity compared to maize in SC, while the intercropping condition shows an intermediate behavior between maize and beans in SC (Figure 1, (a)). Means of Shannon indexes for plant status have similar dynamics (Figure S1), suggesting that both richness and evenness of bacterial communities are impacted by the IC condition. Concentrating on biologically relevant ASVs from trimmed and filtrated tables (3134 taxa), the rhizosphere in intercropping condition includes 508 private species (Figure 1, (b)) for a total of 10334 reads mostly belonging in terms of diversity and abundances to the phyla Proteobacteria (27% and 32%, respectively) (Figure S2). Exploring

private bacterial species in the IC rhizosphere and concentrating on higher taxonomic level (order) for simpler interpretation, some bacterial orders (21) are identified for being absent in maize in SC, as the order Rokubacteriales and Latescibacteriales. Others are present only in the intersection between maize in IC and beans, as Methylococcales and Nitrosococcales along with other bacterial orders absent in maize in SC and that are retrieved from the beans' rhizosphere as Acidimicrobiales, Methyacidiphilales and Fibrobacteriales.

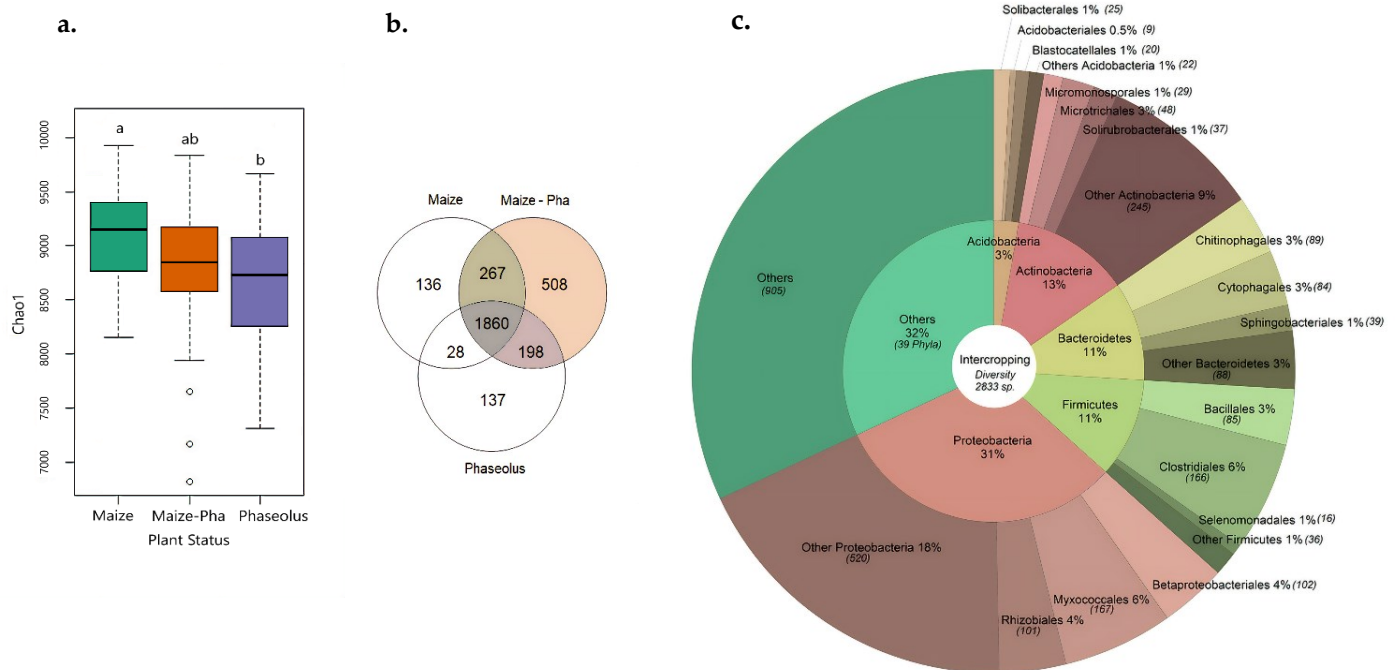

**Figure 1. Bacterial diversity in IC condition** (a) Boxplots of Chao1 diversity index values for means of maize and beans in SC and for the IC condition (Plant Status). Letters above boxplot identify significant differences highlighted by Tukey HSD test. (b) Venn diagram of bacterial species belonging to each subset. (c) Doughnut plot of total bacterial diversity for the IC condition with percentages of phyla in the inner circle and of orders in the outer circle.

Total diversity in the rhizosphere of IC condition is mainly constituted by Proteobacteria (31%) with the orders Betaproteobacteriales, Myxococcales and Betaproteobacteriales (Figure 1, (c)) enclosing the highest diversity within this phyla. Rhizosphere in IC shows an increment in relative abundances of Actinobacteria and Enttheonellaeota compared to maize and beans in SC, while Proteobacteria show an increment in IC compared to maize in SC but relative abundances are comparable to the one of beans in SC. Gemmatimonadetes and Acidobacteria have slightly lower abundances compared to SC (Figure 1, (a)). The most abundant phylum in intercropping is Actinobacteria (40%) (Figure 2, (b)) which is also identified as biomarker for the intercropping system by LefSe analysis (Figure 2, (c, d), Table S4). Within Actinobacteria, the orders Propionibacteriales, Streptomycetales, Micrococcales and Corynebacteriales are reported as biomarker of IC system, thus they show higher relative abundances compared to SC conditions. At phylum level, also Enttheonellaeota results as biomarker of IC condition.

a.

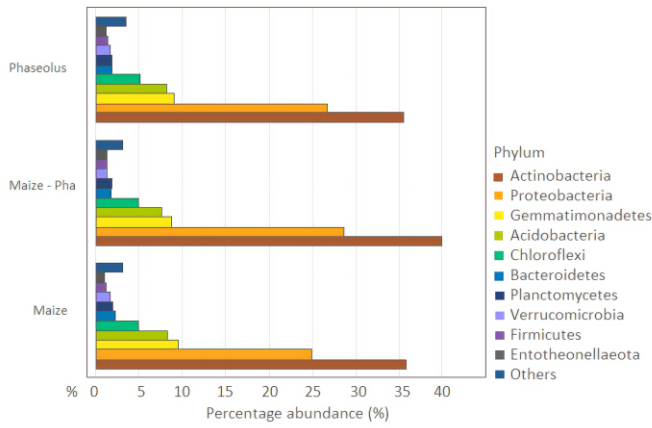

b.

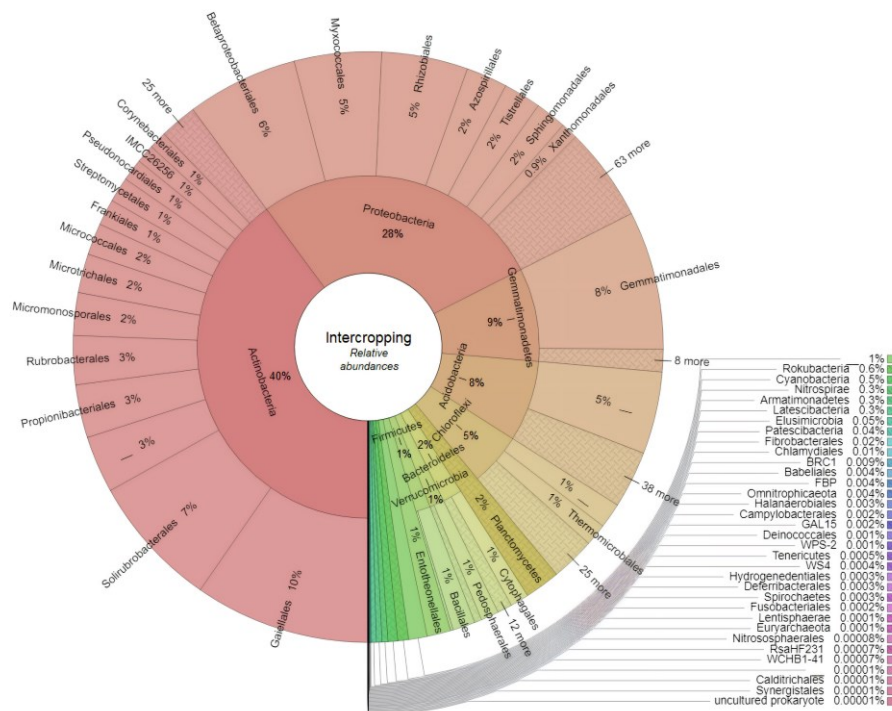

c.

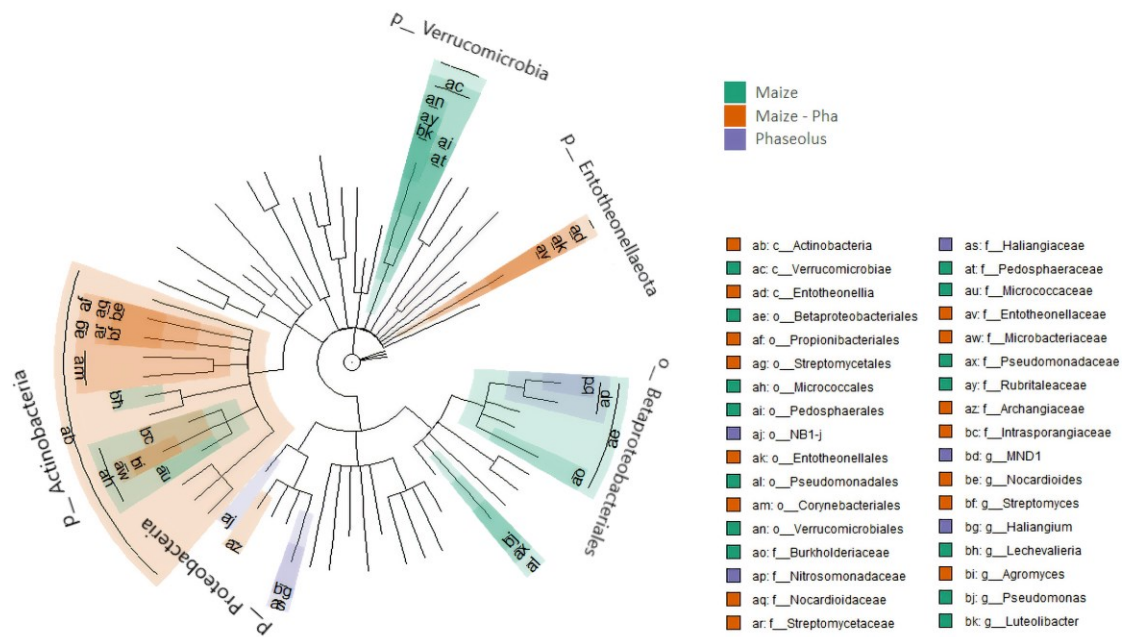

d.

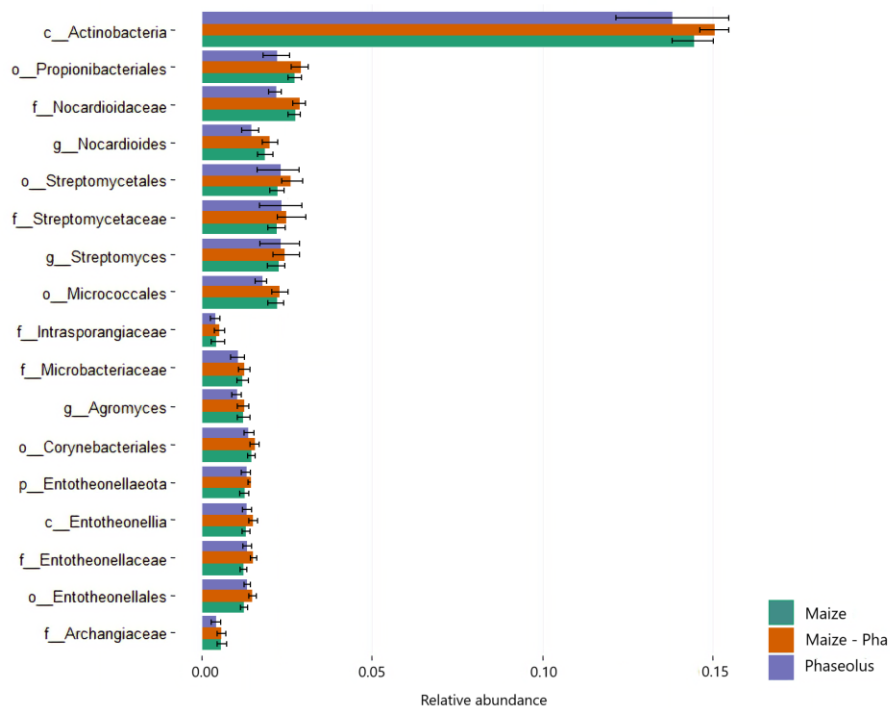



**Figure 2. Bacterial community composition in IC condition** (a) Barplot of relative abundances for Plant Status (Maize in SC, Phaseolus in SC, Maize – Phaseolus IC). (b) Krona plot of relative abundances of the IC condition. (c) Linear discriminant analysis Effect Size (LEfSe) at genus level based on Plant status. The plot shows enriched bacterial genera and their relative upper taxonomy assignment that resulted significantly associated with the three categories that are identified with different colors: Maize in SC (green), Phaseolus in SC (violet), Maize – Pha in IC (orange). (d) Barplot of relative abundances of bacterial members identified for being biomarkers of the IC condition.

2.2 Differentiation of the bacterial community structure in the rhizosphere of the maize / bean intercropping system compared to sole crop.

Properties of correlation networks built for maize in SC and for intercropping condition highlight that network complexity increases in IC (IC: 866 nodes, 48783 edges, 0.13 density) compared to maize in SC (Maize\_SC: 626 nodes, 2488 edges, 0.0126 density) with an increment of significant edges of ~ 20 folds and being 10 times denser than the SC network. On the other side, correlation networks built for bean in SC highlight a community structure characterized by higher network complexity than the one showed by maize in SC and nearer to the one observed in the IC condition (Bean\_SC: 647 nodes, 28939 edges, 0.0872 density). Network differential analysis conducted to compare correlation networks built for SC condition of each species (maize and bean) against the IC condition highlighted that bean in SC does not show significantly differentially correlated nodes compared to the IC condition (verifying the resemblance in structure noted with network properties.). On the other hand, differentially associated nodes are observed for the comparison between maize in SC against the IC condition. Indeed, correlation networks (Figure 3) built with only differentially associated taxa between maize in SC and IC show higher number of connections in IC compared to SC, reducing the number of clusters (Figure 3) between members of the bacterial community in IC. In particular, among differentially associated taxa in IC network, the one having the highest number of connections is the order Rhizobiales (97 nodes). A significant number of connections are shown also for the Chloroflexi\_Ellin 6543 and for the order Frankiales. The order Myxococcales shows the highest increment of connections (40 folds) in IC. Majority of nodes highlighted for being differentially connected in the two networks mostly belong to the phyla Proteobacteria and Actinobacteria, confirming the pivotal role of these two phyla in shaping the IC condition (Table 1).

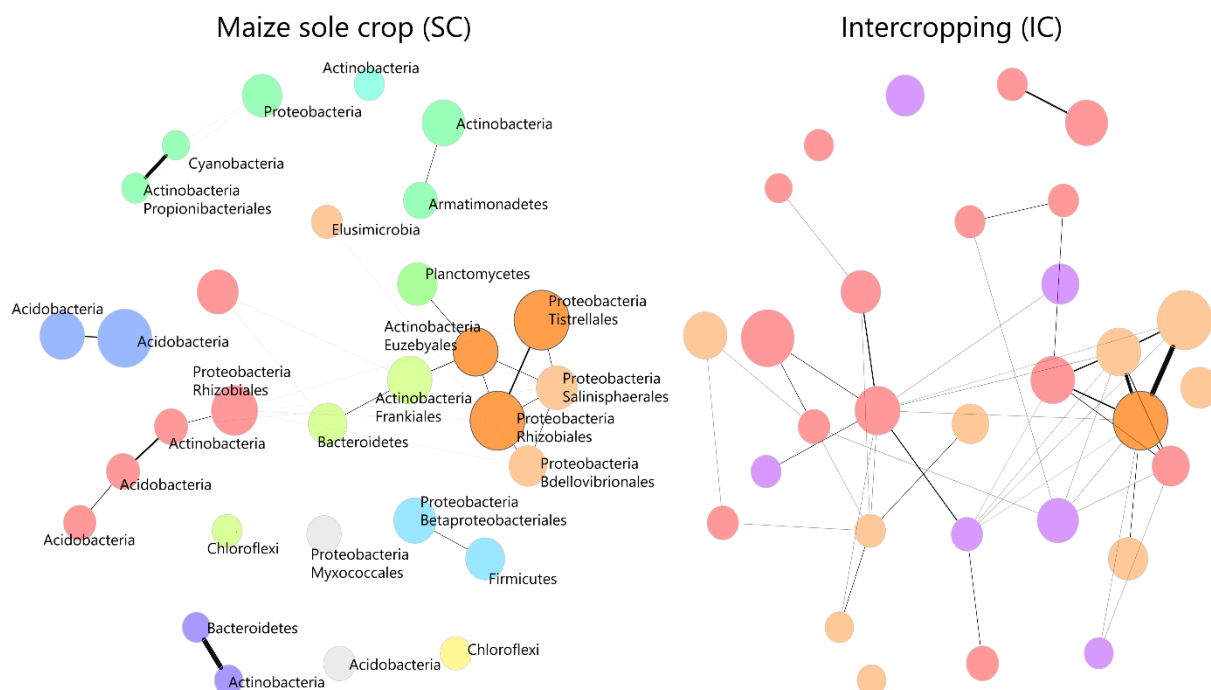

**Figure 3. Differential correlation networks between maize in SC and IC condition.** Correlation networks showing differentially associated taxa between maize in SC and the IC condition. Nodes and edges reported are the ones overpassing the l<sub>dr</sub> threshold applied to the Fisher's z-test. Colors identify different clusters and thickness of lines identify

higher weight of the connection between the nodes. Phyla and/or orders of bacteria representing differentially expressed nodes are reported on the network of maize in SC as they correspond to the nodes of the IC network. Nodes with darker borders identify stronger differences in connections between the two networks. Node size is defined by higher clr values.

**Table 1. Number of connections of nodes differentially correlated between maize in SC and IC.** Nodes significantly differentially correlated between the correlation networks for maize in SC (M\_SC) and for IC are reported and grouped for their belonging to bacterial phyla. Relative number of connections in both conditions are showed.

|                 |                                                                             | M_SC | IC |
|-----------------|-----------------------------------------------------------------------------|------|----|
| Acidobacteria   | Holophagae_Subgroup7_uncultured bacterium gp7                               | 0    | 9  |
|                 | Subgroup5_uncultured Acidobacterium sp.                                     | 4    | 18 |
|                 | Subgroup6_unculture microorganism                                           | 2    | 30 |
|                 | Thermoanaerobaculia_Thermoanaerobaculiales_Thermoanaerobaculaceae_Sub10     | 2    | 20 |
|                 | Acidimicrobiaa_Micotrichales_Illumatobacteraceae_uncultured bacterium       | 8    | 44 |
| Actinobacteria  | Actinobacteria_Elev-16S-976_uncultured bacterium                            | 1    | 2  |
|                 | Actinobacteria_Frankiales_uncultured                                        | 9    | 59 |
|                 | Actinobacteria_Micromonosporales_Micromonosporaceae_Actinorabdospora        | 2    | 17 |
|                 | Actinobacteria_Propionibacteriales_Propionibacteraceae_Haloactinopolyspora  | 1    | 6  |
|                 | Actinobacteria_Streptosporangiales_Thermomonosporaceae_Actinocorolia        | 2    | 11 |
|                 | Nitriliruptoria_Euzebyales_Euzebyaceae_uncultured                           | 12   | 80 |
|                 | Thermoleophilia_Solitubrobacterales_67-14_uncultured Rubrobacteraceae       | 3    | 17 |
| Armatimonadetes | Uncultured bacterium_#0319-6E2                                              | 1    | 28 |
| Bacteroidetes   | Bacteroidia_Chitinophagales_Chitinophagaceae_Vibrionimonas                  | 1    | 22 |
|                 | Ignavibacteria_OPB56_uncultured bacterium_#0319-6E22                        | 5    | 8  |
|                 | Anaerolinae_R8G-13-54-9_uncultured bacterium                                | 2    | 30 |
| Chloroflexi     | TK10_bacterium_Ellin6543_bacterium_Ellis6543                                | 2    | 67 |
| Cyanobacteria   | Oxyphotobacteria_Chloroplast_Trifolium pratense                             | 1    | 19 |
| Elusimicrobia   | Lineage 1b                                                                  | 0    | 11 |
| Firmicutes      | Bacill_Bacillales_Bacillaceae                                               | 3    | 14 |
| Planctomycetes  | VadinHA49_uncultured bacterium                                              | 2    | 12 |
| Proteobacteria  | Alphaproteobacteria_Rhizobiales_Beijerinckiaceae                            | 20   | 97 |
|                 | Alphaproteobacteria_Rhizobiales_KF-JG30-B3                                  | 20   | 81 |
|                 | Alphaproteobacteria_Rhizobiales_Rhizobiales_Incertae_Sedis_Bauldia          | 4    | 27 |
|                 | Alphaproteobacteria_Tistrellales_Germinococcaceae_Candidatus_Alysiosphaera  | 17   | 77 |
|                 | Deltaproteobacteria_Bdellovibrionales_Bdellovibrionaceae_Bdellovibrio       | 5    | 48 |
|                 | Delaproteobacteria_Myxococcales_Bfdi19                                      | 1    | 1  |
|                 | Deltaproteobacteria_Myxococcales_uncultured                                 | 0    | 40 |
|                 | Gammaproteobacteria_Betaproteobacteriales_TRA3-20_uncultured Alcaligenaceae | 3    | 31 |
|                 | Gammaproteobacteria_Salinisphaerales_Solimonadaceae                         | 8    | 11 |

### 2.3 Composition of rhizosphere bacterial community in different maize / bean intercropping combinations.

Bacterial community diversity (Chao1 index) is significantly impacted by different IC combinations (“Accession”) within each “Environment” (bean lines in SC, maize lines in SC and respective IC combinations) ( $p < 0.005$ ) (Table S3). Shannon index, instead, is not significantly impacted by different IC combinations (results not shown). Within bean lines, pC shows a significant lower diversity compared to the other lines of *P. vulgaris*. The two lines p83 and p91 have lower diversity compared to pM and pMNE2. Bacterial diversity shows significant differences among the maize/bean combinations in the IC systems determined by the maize landraces BP and O. Means of Chao1 index values for maize lines intercropped with p83 and p91 show similar behavior with a decrement of the bacterial diversity, while for IC combinations with pM and pMNE2 there is

an increment of the bacterial diversity. This trend resembles the one observed for the corresponding lines of *Phaseolus* in SC and is maintained in all the “Environment” except for the one determined by maize line I (Figure 4, (a)).

CPCoA analysis on Bray-Curtis matrices identified a significant differentiation of the bacterial communities determined by the most contributing phyla in the rhizosphere of IC combinations with BP ( $p$  value < 0.035) and O maize lines ( $p$  value < 0.012). In both cases, centroids of maize lines in SC (BP, O) clusters separately from their IC combinations. The space identified by abundances of bacterial taxa belonging to the most contributing phyla highlight a trend for which IC combinations with BP and O are mostly located where there is a condition of higher abundances and diversities of the microbial community. Interestingly, centroids of maize BP intercropped with p83 and p91 are nearly overlapping and centroids of maize O intercropped with p83 and p91 are located in a space with similar bacterial composition, even if the first is dominated by Actinobacteria and the second by Proteobacteria. In general, for IC “Environments” determined by BP and O maize lines, it seems that IC combinations with p83 and p91 tends to cluster in the same bacterial community space, while the behavior of IC combinations with pM and pMNE2 diverges. Possibly, centroids of these combinations fall in a space determined by relative abundances of diverse phyla, which may contribute less to the bacterial community composition of maize/bean intercropping as a whole but which enclose the higher diversity highlighted by Alpha-diversity index. In all “Environments”, bacterial communities are dominated by the presence of Actinobacteria and Proteobacteria (Figure 4, (b), Figure S3). Permanova (Table 2) shows that Plant status had no significant effect on Bray-Curtis within each “Environment”, but a significant effect of “Accession” is observed in BP and O IC systems, suggesting that significant differentiation is dependent on specific combinations between maize and bean lines.

a.

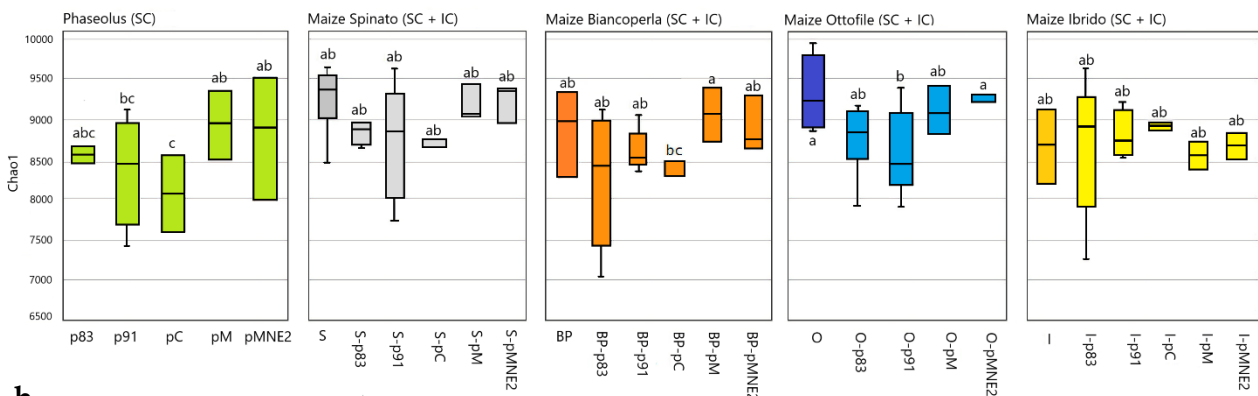

b.

Intercropping system: Maize Biancoperla (BP)

CPCoA by Intercropping combinations (log scale): [33% of variance,  $p < 0.034^*$ , CI = 28%, 38%]

Intercropping system: Maize Ottofile (O)

CPCoA by Intercropping combinations (log scale): [32% of variance,  $p < 0.012^*$ , CI = 28%, 38%]

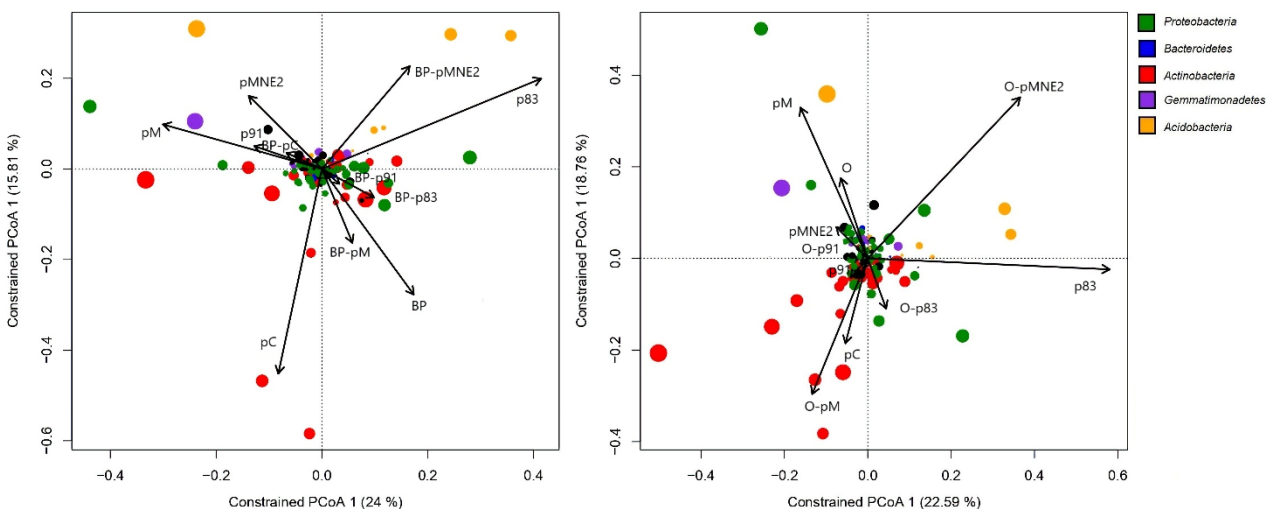

**Figure 4. Bacterial diversity in different IC combinations.** (a) Boxplots of Chao1 diversity index values for means of each “Accession” of maize and beans grown in SC and for each maize / bean IC combination. Letters above boxplot identify



significant differences highlighted by Tukey HSD test. (b) Constrained Principal Coordinate analysis (PcoA) and biplot of phyla scores of PcoA analysis based on Bray-Curtis distances of rhizosphere samples in IC systems of BP e O, constrained by "Accessions" including maize and beans in SC and different IC combination with the maize line. The percentage of variation explained by each axis refers to the fraction of the total variance of the data explained by the constrained factor (33% and 32% for BP and O systems, respectively). CAP analysis shows a significant effect on sample clustering by "Accessions" ( $p < 0.034$  and  $p < 0.012$  in BP and O systems, respectively). The arrows point to the centroid of the constrained factor. Circle size depicts the relative abundance of phyla (log scale) that were more contributing in clustering samples. Colors illustrate different phyla as reported in the legend.

**Table 2. Permanova on Bray-Curtis index for different IC combinations.** Permutational analysis of variance based on Bray-Curtis distance matrixes build for each intercropping system determined by maize lines.

| <b>Maize Spinato (S)</b>      | Df | SumofSqs | MeanSqs | F model | R2    | Pr(>F)   |
|-------------------------------|----|----------|---------|---------|-------|----------|
| Plant status                  | 2  | 0.058    | 0.029   | 1.316   | 0.066 | 0.144    |
| Accession                     | 8  | 0.250    | 0.031   | 1.410   | 0.283 | 0.05 *   |
| Residuals                     | 26 | 0.577    | 0.022   | 0.651   |       |          |
| Total                         | 36 | 0.886    | 1.00000 |         |       |          |
| <b>Maize Ibrido (I)</b>       | Df | SumofSqs | MeanSqs | F.Model | R2    | Pr(>F)   |
| Plant status                  | 2  | 0.072    | 0.036   | 1.516   | 0.088 | 0.084    |
| Accession                     | 8  | 0.249    | 0.031   | 1.305   | 0.303 | 0.116    |
| Residuals                     | 21 | 0.500    | 0.024   | 0.609   |       |          |
| Total                         | 31 | 0.821    | 1       |         |       |          |
| <b>Maize Ottofile (O)</b>     | Df | SumofSqs | MeanSqs | F.Model | R2    | Pr(>F)   |
| Plant status                  | 2  | 0.048    | 0.024   | 1.242   | 0.061 | 0.216    |
| Accession                     | 7  | 0.255    | 0.036   | 1.864   | 0.322 | 0.004 ** |
| Residuals                     | 25 | 0.488    | 0.020   | 0.617   |       |          |
| Total                         | 34 | 0.791    | 1       |         |       |          |
| <b>Maize Biancoperla (BP)</b> | Df | SumofSqs | MeanSqs | F.Model | R2    | Pr(>F)   |
| Plant status                  | 2  | 0.045    | 0.023   | 1.061   | 0.054 | 0.357    |
| Accession                     | 9  | 0.290    | 0.032   | 1.503   | 0.341 | 0.02 *   |
| Residuals                     | 24 | 0.515    | 0.021   | 0.605   |       |          |
| Total                         | 35 | 0.85     | 1       |         |       |          |

Majority of bacterial genera differentially expressed (DE) are downregulated in single IC combinations compared to plants in SC (Figure S4). Down-regulated taxa account for relatively small abundances while up-regulated taxa have higher relative abundances, in particular for IC combinations with BP. Taxa differentially expressed mostly belong to phyla Actinobacteria and Proteobacteria and some recurrent bacterial taxa are up-regulated in different IC combinations compared to their maize counterpart in SC. Among bacterial genera DE that are up regulated in IC compared to SC are especially present members of the phyla Actinobacteria, Proteobacteria, Planctomycetes and Chloroflexi. IC combinations with BP and O are the ones showing the highest number of DE bacterial genera (Figure 5, (a)). BP rhizosphere in intercropping conditions show enrichment of bacterial genera belonging to the phyla Actinobacteria, while O in intercropping is enriched of bacterial communities belonging to the phyla Proteobacteria (Figure 5, (b)). Bacterial taxa that are recurrently up regulated in different IC combinations with maize lines BP and O are reported in Figure 5 (c). These members of the bacterial communities may have a pivotal role in shaping the bacterial communities in intercropping condition.

**a.**

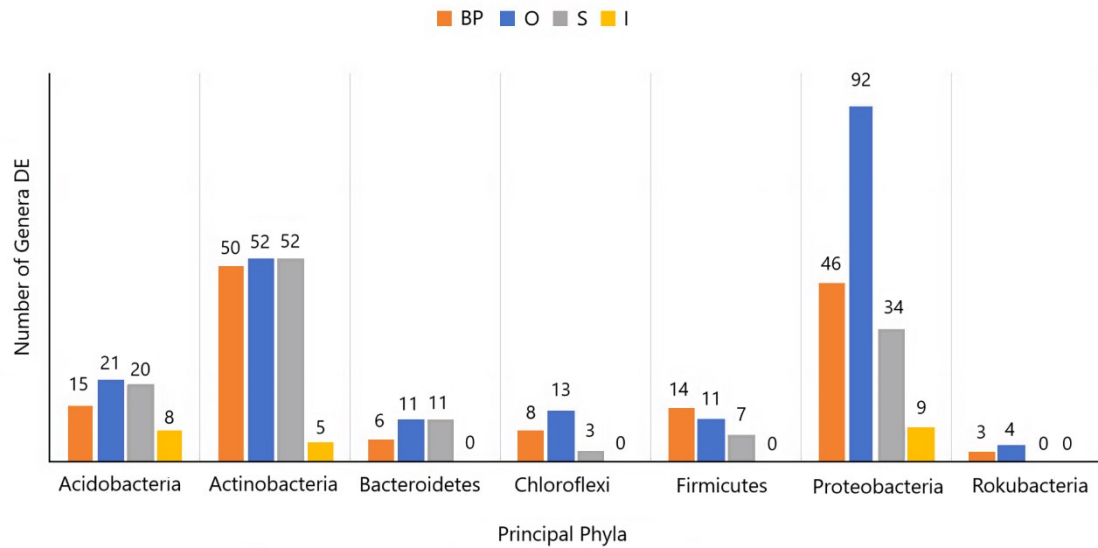

b.

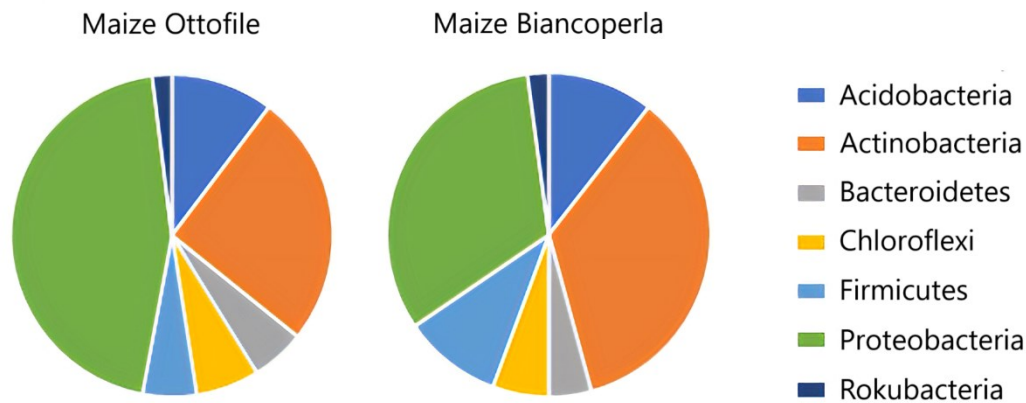

c.

| Bacterial Genera                                                                             | UP                          |
|----------------------------------------------------------------------------------------------|-----------------------------|
| Actinobacteria_Actinobacteria_Corynebacteriales_Nocardiaceae                                 | BP-p83, BP-p91              |
| Actinobacteria_Actinobacteria_Frankiales_Frankiaceae                                         | BP-pC, BP-pMNE2             |
| Actinobacteria_Propionibacteriales_Nocardioidacea_Flindersiella                              | BP-pC                       |
| Armatimonadetes_uncultured Chloroflexi                                                       | O-p83, O-p91, O-pM, O-pMNE2 |
| Chloroflexi_Ellin6543                                                                        | O-p83, O-pMNE2              |
| Proteobacteria_Alphaproteobacteria_Rhizobiales_uncultured bacterium                          | O-p83, O-p91, O-pM, O-pMNE2 |
| Proteobacteria_Deltaproteobacteria_Syntrophobacteriales_Syntrophobacteraceae_Syntrophobacter | O-p83, O-p91, O-pM, O-pMNE2 |

**Figure 5. Bacterial genera differentially expressed in different IC combinations.** (a) Composition of bacterial genera DE between maize in SC and relative IC combinations for each intercropping system (BP, O, S, I) grouped by their belonging to principal phyla identified. (b) Pie plots showing the phyla composition of total bacterial genera DE between BP and O in SC and respective IC combinations. (c) Summary of the recurrent bacterial genera found to be up regulated in different BP and O IC combinations compared to BP and O in SC.

## 2.4 Bacterial community structure in the rhizosphere of different maize / bean intercropping combinations.

Co-occurrence networks built for plants grown in SC and for IC combinations highlight that connections among bacterial communities are modified in IC compared to respective maize lines in SC (Figure 6, (a)). Network of bean landrace p91 behaves differentially from pM and pMNE2. The former show low number of nodes and edges and higher modularity, while the latter have high number of nodes and edges and lower modularity which implies increased network complexity and stronger connection among microbial members.

The IC networks shift towards structures resembling the ones of the bean line associated; S-pM, S-pMNE2, BP-pMNE2 and O-pM networks show increased complexity compared to correspondent maize line in SC. Conversely for IC with p91, S-p91, BP-p91, O-p91 and I-p91 networks experience a reduction in number of nodes and edges, thus lower complexity. Similar behavior is observed for IC with p83 (BP-p83, O-p83, I-p83). Number of connections (degrees) of each node grouped by phyla membership (Figure 6, (b)) ulteriorly shows the divergent network structures of IC combinations with landraces p83 and p91 from IC combinations with pM and pMNE2, confirming the trend of higher number of connections in the former and lower in the latter. Actinobacteria and Proteobacteria are the two phyla showing stronger increment of connections in the IC combinations with pM and pMNE2.

**a.**

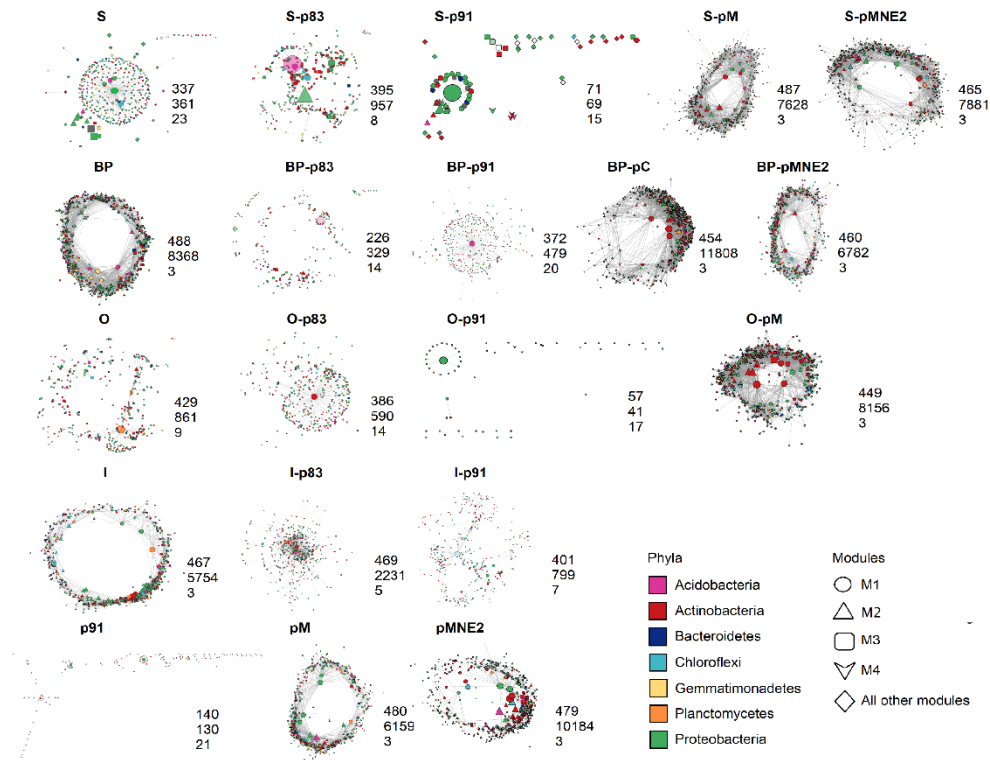

**b.**

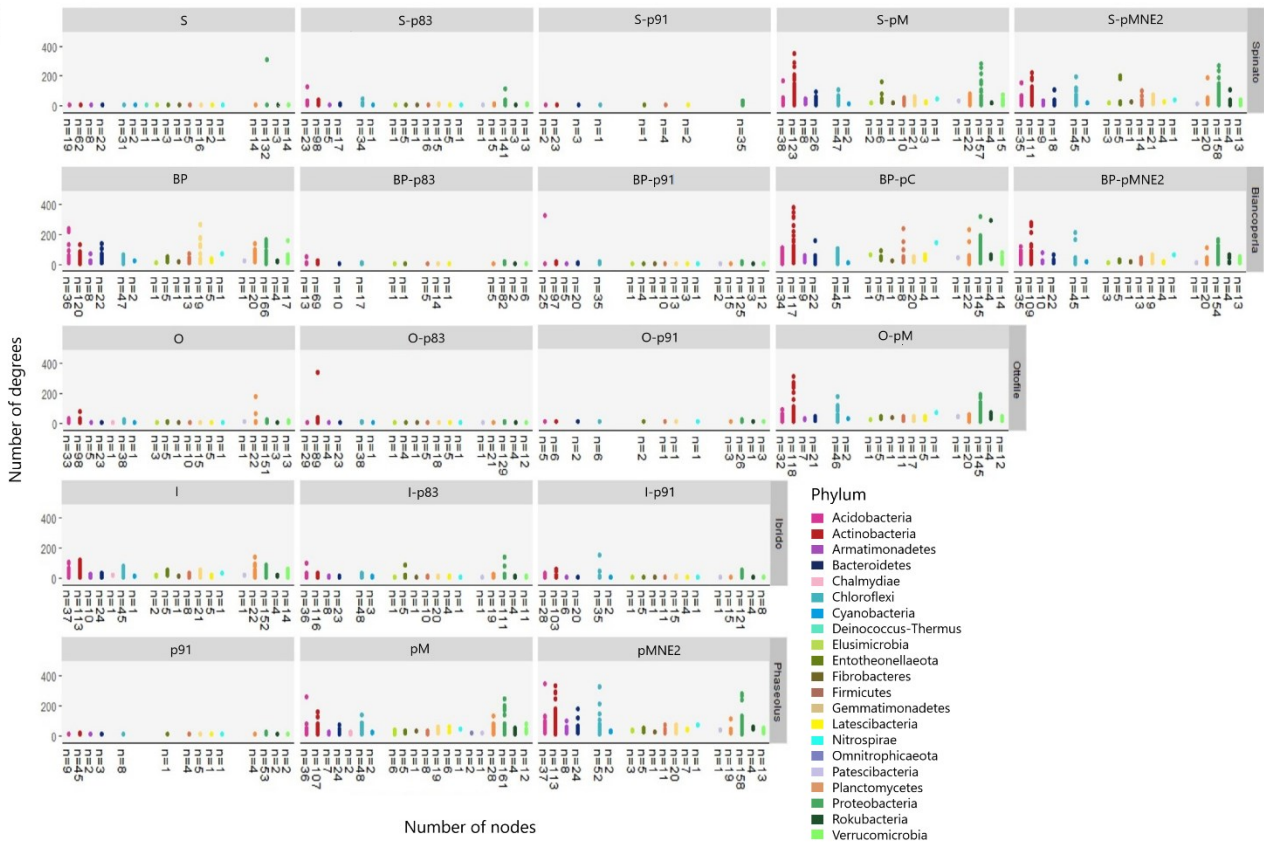

**Figure 6. Co-occurrence bacterial networks for maize and bean in SC and relative IC combinations.** (a) Co-occurrence networks based on SparCC method are reported for maize and beans in SC and for IC combinations and relative number of nodes, edges and modules are reported on the below – right corner of each network. Network representation was created using the Edge-weighted spring embedded layout selecting “edge weight” as variable to build the network. Node shapes were defined based on modularity. Node size was defined using continuous mapping based on degree of each node. Node colors were defined by phyla (selection of more represented phyla with highest centrality values) and color transparency was defined on the basis of nodes betweenness centrality with lower values having more transparency. Edges were represented in gray with transparency based on continuous mapping of edge weight with low weight edges being more transparent. Slight adjustments of values were defined for each network. (b) Nodes for each network are grouped at phylum level and represented with different colors. Number of nodes belonging to each phylum are reported below each graph. Variation in degree values of nodes (connections) grouped by phyla are reported on y axis for each network.

### 3. Discussion

Lately, intercropping practice is receiving more attention due to its beneficial environmental effects including on soil fertility and nutrient availability. Among the mechanisms that are relevant for a better understanding of the dynamics involved in co-cultivation of plant species, the interaction with the microbial members of the soil is of pivotal importance, in particular when considering cereals and legumes [34]. In this regard, studies on rhizobacterial communities involved in intercropping with maize have been conducted for different associations with leguminous crops: i.e., Maize/Soybean [35, 36], Maize/Peanut [37, 38, 39, 40, 41], Maize/Faba bean [42, 43, 44, 45, 46, 47], Maize/Desmodium [48]. These studies validated a remarkable rearrangement of rhizosphere microbiome and a significative effect of plant species involved in the intercropping condition [30, 49]. However, while the impacts on rhizosphere microbiome driven by different species in maize/legume intercropping system have been investigated, little has been done to elucidate the effects of combining different lines of the species involved. Recent studies provided evidence of maize genotype-specific exudation strategies, including their implication for microbial functions [50], corroborating the results on the genotype specificity of the “rhizosphere effect” [24]. Given that intercropping is influenced by synergies happening between root systems and that this likely has an impact on the exudation profiles of the plant species involved



[1], the present study aims to determine whether the specificity of the plant-microbiome interactions observed in co-cultivation condition can be extended also at genotype level. For this purpose, our study compares the rhizosphere bacterial communities of four maize lines (Biancoperla BP, Ottofile O, Spinato S, Ibrido I) and five bean lines (p83, p91, pM, pMNE2, pC) in sole crop (SC) and in co-cultivation, testing all the possible combinations in intercropping (IC). Bacterial communities were characterized and compared for their diversity, composition, and structure through the analysis of 16s sequencing data.

3.1. Members of Proteobacteria and Actinobacteria phyla are at the basis of the reconfiguration of the bacterial community in the rhizosphere of maize/bean intercropping system.

Maize and bean in SC significantly differentiate their bacterial community diversities, confirming the specificity of rhizosphere bacterial recruitment [51, 52]. Bacterial richness represented by Chao1 index is higher in maize compared to beans in SC, suggesting a relevant contribution of rare species in the former. However, evenness of bacterial population based on Shannon index show the same behavior, suggesting that not only rare species are more present in maize in SC but that also common ones are more represented and abundant in maize compared to beans. IC, despite not showing statistically significant differences, shifts its bacterial richness towards intermediate values between maize and beans in SC. This may be explained by the fact that, realistically, the IC condition maintains the starting maize microbiome composition which is then influenced by the presence of the co-associated bean. Alternatively, the observed diversity in IC can be ascribed to the average value determined by employing multiple genotypes which capture a portion of the intra-specific variability of the species involved in the IC combinations.

Concentrating on biologically relevant ASVs, total diversity in IC is dominated by the phylum Proteobacteria (31%), which increases the contribute to total diversity compared to maize in SC (28%) along with Actinobacteria (IC = 13%, maize SC = 8%), while Bacteroidetes (IC = 11%, maize SC = 13%) and Acidobacteria (IC = 19%, maize SC = 3%) decrease their contribute. Interestingly, IC condition enables the recruitment of members of the soil microbiome that were not recruited by maize and beans in SC. Private bacterial species (508) in IC mostly belong to the phyla Proteobacteria followed by Actinobacteria. Grouping the private species individuated by their higher taxonomic levels, it was possible to identify some bacterial orders that are effectively present only in IC (21). Among these, with ecological significance, we highlight the order Rokubacteriales which belong to a newly identified phyla (Rokubacteria) positively correlated with suppression of fungal pathogens [53, 49] and the order Latescibacteriales that show plant-growth promoting activity (PGPR) and that is involved in C metabolism [54]. Other bacterial orders of the IC condition appeared to be private of the intersection between beans in SC and IC (group arising to 198 species). Among these, Methylococcales, potential plant growth promoting bacteria (PGPB) known for their methanotrophic activity and ability to synthesize auxins and induce plant morphogenesis [55, 56]; Nitrosococcales, having a role in enhancing plant growth, carbon and nitrogen fixation [54]; Acidimicrobiales which Cheng et al., [57] found to be involved in soil nitrification; Methyloacidiphilales [58], involved in heterotrophic metabolism and Fibrobacteriales [59], which are associated to extraradical hyphae of arbuscular mycorrhizal fungi (AMF). Our results show that in some cases, intercropping introduces microbes to the roots of the other species, and in other cases, some microbes appear in intercropping condition without necessarily being introduced by the associated species. This further supports the hypothesis that mixed-cropping leads to novel exudates that alter microbial community composition [60].

Despite diversity in IC is dominated by the phylum Proteobacteria, the main contributor in terms of abundances is the phylum Actinobacteria. Actinobacteria were already observed as the most dominant rhizobacterial group in the intercropped legume soil [30] and has been reported for its beneficial interaction with plants [61, 62]. Actinobacteria include the 40% of the total bacterial abundances in IC and it is identified for being a biomarker of the intercropping condition. It is the highest taxonomic level experiencing a significant change in abundances when compared to maize and bean in SC. Within the phylum Actinobacteria, are identified as biomarkers of the IC condition the bacterial order Propionibacteriales with the family Nocardioideaceae, that have a role as PGPB [63, 64], the order Streptomycetales with the family Streptomycetaceae and genus *Streptomyces* which are always involved in mechanisms of plant growth promotion [65], the bacterial order Micrococcales, known for being an AMF-associated bacterial order [66],



with Families Intrasporangiaceae and Microbacteriaceae and the order Corynebacteriales. Apart from Actinobacteria, are identified as biomarkers members of the phylum Entothoonellaeota and the family Archangiaceae involved in carbon cycle within the phylum Proteobacteria [67].

The role of Proteobacteria and Actinobacteria members in shaping the new configuration of the rhizosphere microbiome in IC is determinant also for the structure of the microbial network of IC compared to the one of maize in SC. Indeed, the microbial community structure in IC is significantly altered compared to the one of maize in SC and the taxa highlighted for being significantly differentiated mostly belong to the phyla Actinobacteria and Proteobacteria. In particular, seven Actinobacteria and nine Proteobacteria show a strong increment of connections in IC compared to maize in SC and, within differentially expressed taxa in IC, the one showing the highest number of connections in the new configuration is the order Rhizobiales. Significant increments are observed also for the Actinobacteria of order Frankiales, Propionibacteriales, Micromonosporales and Euzebyales but the strongest change in number of connections from SC to IC is recorded by a member of the class Deltaproteobacteria. When examining the network properties of the IC condition in contrast to those in SC, it becomes evident that IC exhibits a heightened complexity in its community structure, especially when compared to maize in SC. Indeed, while bean in SC shows a number of nodes and, above all, a number of connections nearer to the ones of IC, maize in SC is instead characterized by significantly lower complexity. This may suggest that bean rhizosphere strongly influences the one of the IC system but that, at the same time, IC condition favors a new microbial configuration characterized by a more structured and complex bacterial community which, in turn, can be associated to enhanced functional expression within belowground communities [68, 69].

### 3.2 Combination of different maize / bean lines in intercropping significantly alters the composition and structure of the rhizosphere microbiome.

Bacterial community diversity in bean lines seems to confirm the hypothesis of a core microbiome [70] shared by different genotypes of *P. vulgaris*, while the significantly lower diversity in *P. coccineus* (pC) ulteriorly validates the species-specific effect on microbiome recruitment. Despite not significantly different, mean of diversity values identify two distinct groups determined by the two lines p83 and p91, showing lower bacterial diversity and the two landraces pM and pMNE2, which show higher diversities. Maize lines as well share a core microbiome [71] but the richness changes significantly in some IC combinations with maize lines O and BP, suggesting that they react to associated beans. Shifts in means of bacterial diversity, even when not significant, between maize in SC compared to their IC combinations clusters separately for IC combinations with p83 and p91 and IC combinations with pM and pMNE2, showing lower and higher diversity, respectively. Interestingly, the observed shifts resemble the behavior of bean lines in SC, leading to the hypothesis that bean lines have an impact on the definition of the new microbial configuration in IC.

Dissimilarity analysis [72] shows that BP and O experience a significantly consistent host-line dependent stratification of the microbiome determined by the genotypes involved. Moreover, it confirms a differential trend between IC combinations with p83 and p91 and those with pM and pMNE2 that cluster in space that are characterized by diverse bacterial community compositions. The genotype-dependent host effect is shaped by shifts in members of the phyla Proteobacteria, Bacteroidetes, Actinobacteria, Gemmatimonadetes and Acidobacteria, thus variations of many taxa, even if of limited entity, rather than by single ones influence the configuration of the IC microbiome in various combinations. This is in line with results obtained from Alpha-diversity analysis where the contribution of rare taxa determined the significant differences highlighted by Chao1 index. Further confirmations on the stronger impact of IC condition on the microbial community of the rhizosphere of O and BP maize genotypes derive from the numbers of differential expressed bacterial genera between SC and IC conditions. Indeed, BP and O maize lines are the one showing higher numbers of differentially expressed taxa in IC combinations compared to SC, with BP showing majority of changes within the phyla Actinobacteria and O in the phyla Proteobacteria. Exploring more in details the bacterial members highlighted for shifting their abundances from SC to IC condition, members of Burkholderiaceae family appears recurrently downregulated in IC [31]. Burkholderia are involved in various mechanisms from N-fixation to plant growth promotion [73]. Li et al. [74] found that Burkholderiales decrease their abundance with N fertilizer application, suggesting that they may be inhibited by high soil N [75]. However, majority of

taxa that are recurrently reported for being differentially expressed between SC and IC appear to be consistently upregulated in the IC condition. O in IC show recurrent taxa upregulated in IC with PGPB role or N fixation ability [76, 77, 78]. BP in IC show several members of phylum Actinobacteria that are upregulated compared to SC, including Nocardiaceae and Frankiales which are known PGPR and nitrogen-fixing bacteria [64, 79]. O shows more changes when intercropped to p83 and pM with enrichment of Proteobacteria members as Syntrophobacterales and Rhizobiales. S shows enrichment in Syntrophobacteraceae and Rhizobiales when intercropped with p83. Notably, the entire phyla Rokubacteria appears as differentially expressed only in BP and O. Overall, from differential analysis emerges that O and BP are more responsive to IC, followed by Spinato while I line seems the less responsive. Furthermore, certain bacterial members belonging to the phyla Proteobacteria and Actinobacteria appear to be particularly engaged in the IC condition as they are preferentially recruited by more responsive maize lines and could be regarded as potential candidates for assessing genotype combinations in the context of IC.

Co-occurrence networks enable to evaluate structure and functionality of bacterial communities [22, 27, 29, 60, 80, 81, 82, 83, 84] and evidence suggests that complex networks with higher number of degree and edges and lower modularity corresponds to increased function expression in belowground communities [84]. In our study, co-occurrence networks were used to compare community structure among SC and IC combinations. Despite the impossibility to build networks for all conditions (due to limited number of samples), extracted network properties and their comparison among conditions provide interesting cues. Again, two groups can be distinguished within bean lines with p91 showing lower network complexity compared to pM and pMNE2 and this dynamic is observed in IC combinations as well. Similar behavior seems shared by IC with p83, thus we may hypothesize that p83 possibly shares similar community structure with p91. Hence, it is possible to deduce that the trend observed for bacterial diversity in IC combinations is mimed by the behavior of co-occurrence network complexity. Indeed, two distinct groups characterized by higher or lower network complexity are highlighted. Moreover, this dynamic seems again to be influenced by the bean line associated which determine the shifts in the community structure of the maize lines from SC condition towards the one of IC. Furthermore, co-occurrence network properties also confirm the pivotal role of Actinobacteria and Proteobacteria as they are generally more represented in all networks.

## 4. Materials and Methods

### 4.1 Plant materials and Experimental Design

This study was conducted at the farm of the Polytechnic University of Marche (UNIVPM) "P. Rosati" (43°33'47.8"N 13°25'44.6"E, Marche region, Italy) for the two consecutive years 2018 and 2019 (climatic data can be found at <http://www.meteo.marche.it/news/anno2018/clima2018.pdf> and <http://www.meteo.marche.it/news/2019/anno/clima2019.pdf> for the year 2018 and 2019, respectively). The plant material selected for the experiment comprised four maize lines (*Zea mays* L.), which included three Italian landraces [85] (Spinato -S-, Ottofile -O-, Biancoperla -BP-) and one commercial hybrid (Italian Marano, flint type Ibrido -I-), and five bean lines. The bean lines (*Phaseolus vulgaris* L.) consisted of one Italian (BEAN-ADAPT code EcE083, referred to as p83) and one Greek landrace (BEAN-ADAPT code EcE091, referred to as p91), recognized as high-yielding based on results from the BEAN-ADAPT Project [86, 87] and two local varieties from Italy (BEAN-ADAPT code EcE136, referred to as pM) and Montenegro (referred to as pMNE2), with the latter traditionally grown in intercropping with maize in Montenegro). Additionally, one runner bean (*Phaseolus coccineus* L.) landrace from Italy (known as Clusven bean, referred to as pC) was included in the study (Table 3).

Each line was grown in sole crop (SC) and in full pairwise design for a total of twenty intercropping (IC) combinations (4 maize lines × 5 bean lines). Each condition was replicated three times in complete randomized design. Each plot measured 3 m × 3.2 m with 1 m between replicates. Bean and maize lines were sowed on rows and in IC beans were planted after the emergence of maize, at about 5 cm from the maize stalk. Standard densities for maize (0,80 m between rows and 0,30 m among individuals in the same row) and bean (a plant

every 0,30 m inside the row, 0,70 m between rows) were used. Maize BP was used as border. Both years, three weeks before sowing, the field was weeded. No other treatment or fertilization was carried out during growing season, except ones for corn borer on calendar dates. Beans were sown two weeks after maize and one month later the field was weeded by hand and a pass between the rows was made with the rotary tiller. Throughout the growing season of the trial, relief irrigation was provided by means of a drip system. Bread wheat (*Triticum aestivum*) was used as previous crop for both years of the trial. In bean monoculture plots, support nets were installed to allow the bean to climb.

At flowering time, plants root systems were excavated and from each plant, approximately 15-20 cm below-ground, was sampled the soil gently brushed away from root tissues defined as rhizosphere. Physical/chemical characteristics of the soil are reported in Table S1. Soil analyses were performed by the ASSAM (Regional Agrochemical Centre) Analysis Laboratory using standard operational procedures. Samples were put in a tube and immediately stored in liquid nitrogen and successively at -80°C. Respectively, 54 and 41 rhizosphere samples were collected at first and second year of field experiment for a total of 95 samples. Combination of different maize / bean lines in intercropping significantly alters the composition and structure of the rhizosphere microbiome.

**Table 3. Plant material.** For each genotype are reported the acronyms used in this study, the plant species, the description of the type of material (e.g., landraces), its geographical origin and the common name when available.

| Plant material |                     |                   |            |                      |
|----------------|---------------------|-------------------|------------|----------------------|
| Acronyms       | Species             | Description       | Origin     | Common name          |
| p83            | <i>P. vulgaris</i>  | Landrace          | Italy      | -                    |
| p91            | <i>P. vulgaris</i>  | Landrace          | Greece     | -                    |
| pC             | <i>P. coccineus</i> | Landrace          | Italy      | Fagiolo di Clusven   |
| pM             | <i>P. vulgaris</i>  | Landrace          | Italy      | Monachello           |
| pMNE2          | <i>P. vulgaris</i>  | Landrace          | Montenegro | -                    |
| S              | <i>Zea mays</i>     | Landrace          | Italy      | Spinato              |
| BP             | <i>Zea mays</i>     | Landrace          | Italy      | Biancoperla          |
| O              | <i>Zea mays</i>     | Landrace          | Italy      | Ottofile             |
| I              | <i>Zea mays</i>     | Commerical hybrid | -          | Ibrido (tipo Marano) |

#### 4.2 Metabarcoding analysis

Genomic DNA was extracted from approximately 250 mg of each sample by means of the DNeasy PowerSoil kit (Qiagen, CD Genomics Company, Shirley, NY 11967, USA) following manufacturer instructions with slight modifications, i.e., time for cell lysis through vortexing at maximum speed was increased up to thirty minutes. Samples concentration was measured with a Qubit BR dsDNA assay kit (Thermofisher) and showed to be between 2 ng/  $\mu$ l and 120 ng/ $\mu$ l. Profile on a Tape Station 4120 with a genomic ScreenTape showed a DIN>6 for the 8 samples randomly tested. DNA libraries were prepared with the Swift Amplicon 16S Panel kit (Swift Biosciences) according to protocol with 50 ng as starting material. Libraries were sequenced on a NovaSeq 6000 Illumina platform with a SP flow cell in a 250 PE mode and about 1 to 2 million fragments were produced per sample. The quality control (QC) was performed using Fastqc v 0.11.9; reads showed a very high average sequencing quality. The analysis on 16S region was performed on 600,000 reads (twice as much as recommended by Swift Biosciences). The analysis was carried out using the QIIME2 analysis workflow provided by Swift Biosciences and available at [https://github.com/swiftbiosciences/q2\\_ITS](https://github.com/swiftbiosciences/q2_ITS), with default parameters. Reads carrying 16S ranged from 380,568 to 588,712 reads, while reads passing the denoising pipeline to the classification process ranged from 327,910 to 498,128 reads. Reads from 16S were then classified using the Naïve-Bayes classifier trained on Silva\_v132\_99\_16S. A total of 3,134 species were identified. All statistical analyses were performed in R Software, R version 4.1.1 [88].

#### 4.3 Statistical analysis

Diversity indexes were obtained with the QIIME2 pipeline on untrimmed data and multi-factorial anova along with Tukey HSD test was applied on obtained values (aov, base stats (v. 4.1.1)) to test the effect of “Cropping system” (SC vs IC), “Plant status” (maize in SC vs beans in SC vs IC) and of “Accessions” within “Environment” (where “Environment” refers to a maize line in SC and its specific IC combinations, while “Accession” properly refers to all lines in SC and IC combinations).

ASVs (Amplicon Sequence Variants) table was then filtered to concentrate on biologically relevant bacterial taxa using the phyloseq R package (v. 1.30.0) [89], obtaining a final table of 3134 taxa at species level. Venn diagram was utilized to characterize private bacterial members of the IC condition and Krona plot (KronaTools, v.2.7.1) was used to characterize the diversity of the IC subset through percentage contribution of bacterial phyla and orders. Canonical analysis of principal coordinates (CAP analysis, [Partial] Distance-Based Redundancy Analysis, capscale function Vegan v.2.5) was performed on squared root transformed Bray-Curtis matrix [90] for each “Environment”. Anova – like permutation analysis was performed (anova.cca function [91]) to define statistical significance of tested factors (“Accessions” within “Environment”). Constrained Principal Coordinate Analysis (CPCoA) is used to ordinate factor’s centroids and ASVs scores. Permanova was used to test the effects of “Plant status” and “Accession” within “Plant status” (strata() function).

Linear Discriminant Analysis (LDA) Effect Size (LEfSe) [92] was used to identify biomarkers of plants in SC and IC condition (LDA threshold 2.5, p value < 0.05). Differential abundance analysis between lines in SC and IC combinations was conducted with metagenomeSeq package [93] on cumulative – sum scaled table (cumNorm function) and a Zero-Inflated Gaussian Distribution Mixture Model was applied (fitZig). Coefficients were used in a moderated t-test (makeContrasts and eBayes commands, Limma (v. 3.42.2) [94, 95]) and p values adjusted with Benjamini-Hochberg (p value < 0.01). UpSetR (v.1.4) was used to concentrate on taxa differentially expressed (DE) proper of IC condition (taxa DE between beans and maize in SC and shared with taxa DE in beans in SC versus IC were excluded, Figure S5).

Differential Network Analysis between maize and bean in SC compared to IC condition was conducted on Pearson correlation networks built with cluster\_fast\_greedy function on the 900 most variable taxa (out of 2271 taxa). Fisher’s z-test was applied to identify differentially correlated (DC) taxa and p values adjusted with local false discovery rate (lfd). Differential networks were plotted with the “union” function (NetCoMi). Properties and degree values of DC nodes were retrieved for each network. Co-occurrence networks were built for maize and bean lines in SC and for IC combinations having at least 5 replicates with the SparCC method (trans\_network function, microeco (v.0.11) (<https://github.com/stefpeschel/NetCoMi>, [96]) on normalized table (NetCoMi (v. 1.0.3)). The cor\_optimization function found the optimal coefficient threshold and cor\_cut value was set up for each network. Networks properties were extracted with “Analyze network” tool in Cytoscape (v. 3.9.1).

## 5. Conclusions

The present study confirms that intercropping condition (IC) alters the rhizosphere bacterial population, but it underscores that the degree of this impact is substantially affected by the specific genotype combinations employed. Our data indicate that IC induces a novel microbial configuration marked by distinct bacterial species exclusive to this condition, supporting the hypothesis that crop diversity leads to novel exudates that alter the microbial community composition. Moreover, community structure in IC exhibits more intricate interconnections within bacterial communities compared to the sole cropping (SC) of maize. In particular, bacterial members recognized for their involvement in nitrogen fixation, such as the order Rhizobiales, significantly expand their network connectivity in IC as opposed to maize in SC. Notably, our findings emphasize that specific combinations of genotypes are significantly linked to shifts in the composition of bacterial communities. In particular, two distinct groups of IC combinations are highlighted for having higher or lower bacterial diversity and community complexity. The diversity of the rhizosphere microbiome appears to be influenced by the presence of associated beans in the IC system, and similar dynamics are observed in co-occurrence networks. In addition, maize lines in IC exhibit varying propensities in recruiting bacterial members, and among the taxa consistently enriched in IC, some may be promising candidates for evaluating genotype combinations in IC. In essence, our findings reveal that the presence of the associated bean line



exerts a significant impact on shaping and altering the microbiome of maize when compared to its monoculture counterpart. Moreover, specific maize lines show different responses to the associated legume. Ultimately, our study not only suggests that genotypic selection could be important for adaptation to intercropping, but also that this must be carried out on both species employed. Furthermore, genotype combinations clearly affect the state of microbial communities in the rhizosphere, which could be evaluated to booster long-term benefits and enhance sustainability of agricultural systems. We are convinced of the need for further studies to continue dissecting the role of the rhizosphere microbiome on the beneficial effects of different intercropping systems.

**Supplementary Materials:** Figure S1: Means of Shannon diversity index for Plant Status; Figure S2: Diversity and composition of private bacterial members for IC condition; Figure S3: CPcoA for IC combinations with maize I and S; Figure S4: Bacterial genera differentially expressed in IC combinations. Figure S5: Bacterial genera differentially expressed in IC combinations and proper of IC condition; Table S1: Physical/chemical characteristics of the soil; Table S2: Anova on Alpha-diversity indexes for Plant status and Cropping system; Table S3; Multi-factorial Anova on Chao1 index to test the effect of genotypes combinations in IC; Table S4: p-values and LDA scores of LefSE analysis.

**Author Contributions:** Conceptualization, L.N. and R.P.; formal analysis, G.L., I.F. and G.C.; investigation, G.F., L.R., E.B, E.B.; writing—original draft, G.L. and L.N.; writing—review and editing, G.L., G.F, L.R., I.F., G.C., E.B., E.B, V.D.V, F.S., M.D., L.N. and R.P

All authors have read and agreed to the published version of the manuscript.

**Funding:** This study was supported by Marche Polytechnic University, Strategic University Projects: “Novel strategies for innovative plant breeding: from monoculture to crop associations” and H2020 Radiant Project: “Realising Dynamic Value Chains for Underutilised Crops”.

**Data Availability Statement:** The raw sequence reads generated and analysed during this study are available in the Sequence Read Archive (SRA) of the National Center for Biotechnology Information (NCBI) with the BioProject number PRJNA1030176.

**Conflicts of Interest:** The authors declare no conflict of interest.

## References

1. Duchene, O.; Vian, J.-F.; Celette, F. Intercropping with Legume for Agroecological Cropping Systems: Complementarity and Facilitation Processes and the Importance of Soil Microorganisms. *Agriculture, Ecosystems & Environment* 2017, 240, 148–161. <https://doi.org/10.1016/j.agee.2017.02.019>
2. Jensen, E.; Bedoussac, L.; Carlsson, G.; Journet, E.; Justes, E.; Hauggaard-Nielsen, H. Enhancing Yields in Organic Crop Production by Eco-Functional Intensification. *Sustainable Agriculture Research*, 4 (3), 42–50. 2015.
3. Willey, R. Evaluation and Presentation of Intercropping Advantages. *Experimental agriculture* 1985, 21 (2), 119–133. <https://doi.org/10.1017/S0014479700012400>
4. Altieri, M. A. Applying Agroecology to Enhance the Productivity of Peasant Farming Systems in Latin America. *Environment, Development and Sustainability* 1999, 1, 197–217. <https://doi.org/10.1023/A:1010078923050>
5. Knörzer, H.; Graeff-Hönninger, S.; Guo, B.; Wang, P.; Claupein, W. The Rediscovery of Intercropping in China: A Traditional Cropping System for Future Chinese Agriculture—a Review. *Climate Change, Intercropping, Pest Control and Beneficial Microorganisms: Climate change, intercropping, pest control and beneficial microorganisms* 2009, 13–44. [https://doi.org/10.1007/978-90-481-2716-0\\_3](https://doi.org/10.1007/978-90-481-2716-0_3)
6. Maitra, S.; Hossain, A.; Brestic, M.; Skalicky, M.; Ondrisik, P.; Gitari, H.; Brahmachari, K.; Shankar, T.; Bhadra, P.; Palai, J. B. Intercropping—A Low Input Agricultural Strategy for Food and Environmental Security. *Agronomy* 2021, 11 (2), 343. <https://doi.org/10.3390/agronomy11020343>
7. Loreau, M.; Barbier, M.; Filotas, E.; Gravel, D.; Isbell, F.; Miller, S. J.; Montoya, J. M.; Wang, S.; Aussenac, R.; Germain, R. Biodiversity as Insurance: From Concept to Measurement and Application. *Biological Reviews* 2021, 96 (5), 2333–2354. <https://doi.org/10.1111/brv.12756>



8. Jensen, E. S.; Chongtham, I. R.; Dhamala, N. R.; Rodriguez, C.; Carton, N.; Carlsson, G. Diversifying European Agricultural Systems by Intercropping Grain Legumes and Cereals. *Ciencia e investigación agraria: revista latinoamericana de ciencias de la agricultura* 2020, 47 (3),174–186.
9. De Deyn, G. B.; Cornelissen, J. H.; Bardgett, R. D. Plant Functional Traits and Soil Carbon Sequestration in Contrasting Biomes. *Ecology letters* 2008, 11 (5), 516–531. <https://doi.org/10.1111/j.1461-0248.2008.01164.x>
10. De Deyn, G. B.; Shiel, R. S.; Ostle, N. J.; McNamara, N. P.; Oakley, S.; Young, I.; Freeman, C.; Fenner, N.; Quirk, H.; Bardgett, R. D. Additional Carbon Sequestration Benefits of Grassland Diversity Restoration. *Journal of Applied Ecology* 2011, 48 (3), 600–608. <https://doi.org/10.1111/j.1365-2664.2010.01925.x>
11. Raji, S. G.; Dörsch, P. Effect of Legume Intercropping on N<sub>2</sub>O Emissions and CH<sub>4</sub> Uptake during Maize Production in the Great Rift Valley, Ethiopia. *Biogeosciences* 2020, 17 (2), 345–359. <https://doi.org/10.5194/bg-17-345-2020>
12. Fréville, H.; Montazeaud, G.; Forst, E.; David, J.; Papa, R.; Tenaillon, M. I. Shift in Beneficial Interactions during Crop Evolution. *Evolutionary Applications* 2022, 15 (6), 905–918. <https://doi.org/10.1111/eva.13390>
13. Murphy-Bokern, D.; Peeters, A.; Westhoek, H. The Role of Legumes in Bringing Protein to the Table. In *Legumes in cropping systems*; CABI Wallingford UK, 2017; pp 18–36. <https://doi.org/10.1079/9781780644981.0018>
14. Bellucci, E.; Mario Aguilar, O.; Alseekh, S.; Bett, K.; Brezeanu, C.; Cook, D.; De la Rosa, L.; Delledonne, M.; Dostatny, D. F.; Ferreira, J. J. The INCREASE Project: Intelligent Collections of Food-legume Genetic Resources for European Agrofood Systems. *The Plant Journal* 2021, 108 (3), 646–660. <https://doi.org/10.1111/tpj.15472>
15. Mamine, F.; Farès, M. Barriers and Levers to Developing Wheat–Pea Intercropping in Europe: A Review. *Sustainability* 2020, 12 (17), 6962. <https://doi.org/10.3390/su12176962>
16. Lakshmanan, V.; Selvaraj, G.; Bais, H. P. Functional Soil Microbiome: Belowground Solutions to an Aboveground Problem. *Plant physiology* 2014, 166 (2), 689–700. <https://doi.org/10.1104/pp.114.245811>
17. Layek, J.; Das, A.; Mitran, T.; Nath, C.; Meena, R. S.; Yadav, G. S.; Shivakumar, B.; Kumar, S.; Lal, R. Cereal+ Legume Intercropping: An Option for Improving Productivity and Sustaining Soil Health. *Legumes for soil health and sustainable management* 2018, 347–386. [https://doi.org/10.1007/978-981-13-0253-4\\_11](https://doi.org/10.1007/978-981-13-0253-4_11)
18. Bedoussac, L.; Journet, E.-P.; Hauggaard-Nielsen, H.; Naudin, C.; Corre-Hellou, G.; Jensen, E. S.; Prieur, L.; Justes, E. Ecological Principles Underlying the Increase of Productivity Achieved by Cereal-Grain Legume Intercrops in Organic Farming. A Review. *Agronomy for sustainable development* 2015, 35, 911–935. <https://doi.org/10.1007/s13593-014-0277-7>
19. Bedoussac, L.; Justes, E. The Efficiency of a Durum Wheat-Winter Pea Intercrop to Improve Yield and Wheat Grain Protein Concentration Depends on N Availability during Early Growth. *Plant and soil* 2010, 330, 19–35. <https://doi.org/10.1007/s11104-009-0082-2>
20. Bedoussac, L.; Justes, E. Dynamic Analysis of Competition and Complementarity for Light and N Use to Understand the Yield and the Protein Content of a Durum Wheat–Winter Pea Intercrop. *Plant and soil* 2010, 330, 37–54. <https://doi.org/10.1007/s11104-010-0303-8>
21. Hinsinger, P.; Betencourt, E.; Bernard, L.; Brauman, A.; Plassard, C.; Shen, J.; Tang, X.; Zhang, F. P for Two, Sharing a Scarce Resource: Soil Phosphorus Acquisition in the Rhizosphere of Intercropped Species. *Plant physiology* 2011, 156 (3), 1078–1086. <https://doi.org/10.1104/pp.111.175331>
22. Pivato, B.; Semblat, A.; Guégan, T.; Jacquiod, S.; Martin, J.; Deau, F.; Moutier, N.; Lecomte, C.; Burstin, J.; Lemanceau, P. Rhizosphere Bacterial Networks, but Not Diversity, Are Impacted by Pea-Wheat Intercropping. *Frontiers in Microbiology* 2021, 12, 674556. <https://doi.org/10.3389/fmicb.2021.674556>
23. Berg, G.; Smalla, K. Plant Species and Soil Type Cooperatively Shape the Structure and Function of Microbial Communities in the Rhizosphere. *FEMS microbiology ecology* 2009, 68 (1), 1–13. <https://doi.org/10.1111/j.1574-6941.2009.00654.x>
24. Peiffer, J. A.; Spor, A.; Koren, O.; Jin, Z.; Tringe, S. G.; Dangl, J. L.; Buckler, E. S.; Ley, R. E. Diversity and Heritability of the Maize Rhizosphere Microbiome under Field Conditions. *Proceedings of the National Academy of Sciences* 2013, 110 (16), 6548–6553. <https://doi.org/10.1073/pnas.1302837110>
25. Zhong, Y.; Yang, Y.; Liu, P.; Xu, R.; Rensing, C.; Fu, X.; Liao, H. Genotype and Rhizobium Inoculation Modulate the Assembly of Soybean Rhizobacterial Communities. *Plant, cell & environment* 2019, 42 (6), 2028–2044. <https://doi.org/10.1111/pce.13519>
26. Pivato, B.; Mazurier, S.; Lemanceau, P.; Siblot, S.; Berta, G.; Mougél, C.; Van Tuinen, D. Medicago Species Affect the Community Composition of Arbuscular Mycorrhizal Fungi Associated with Roots. *New Phytologist* 2007, 176 (1), 197–210. <https://doi.org/10.1111/j.1469-8137.2007.02151.x>
27. Pivato, B.; Bru, D.; Busset, H.; Deau, F.; Matejcek, A.; Philippot, L.; Moreau, D. Positive Effects of Plant Association on Rhizosphere Microbial Communities Depend on Plant Species Involved and Soil Nitrogen Level. *Soil Biology and Biochemistry* 2017, 114, 1–4. <https://doi.org/10.1016/j.soilbio.2017.06.018>
28. Tkacz, A.; Bestion, E.; Bo, Z.; Hortala, M.; Poole, P. S. Influence of Plant Fraction, Soil, and Plant Species on Microbiota: A Multikingdom Comparison. *MBio* 2020, 11 (1), 10–1128. <https://doi.org/10.1128/mbio.02785-19>
29. Li, S.; Wu, F. Diversity and Co-Occurrence Patterns of Soil Bacterial and Fungal Communities in Seven Intercropping Systems. *Frontiers in microbiology* 2018, 9, 1521. <https://doi.org/10.3389/fmicb.2018.01521>

30. Chamkhi, I.; Cheto, S.; Geistlinger, J.; Zeroual, Y.; Kouisni, L.; Bargaz, A.; Ghoulam, C. Legume-Based Intercropping Systems Promote Beneficial Rhizobacterial Community and Crop Yield under Stressing Conditions. *Industrial Crops and Products* 2022, 183, 114958. <https://doi.org/10.1016/j.indcrop.2022.114958>
31. Lai, H.; Gao, F.; Su, H.; Zheng, P.; Li, Y.; Yao, H. Nitrogen Distribution and Soil Microbial Community Characteristics in a Legume–Cereal Intercropping System: A Review. *Agronomy* 2022, 12 (8), 1900. <https://doi.org/10.3390/agronomy12081900>
32. Liu, Y.; Yang, H.; Liu, Q.; Zhao, X.; Xie, S.; Wang, Z.; Wen, R.; Zhang, M.; Chen, B. Effect of Two Different Sugarcane Cultivars on Rhizosphere Bacterial Communities of Sugarcane and Soybean upon Intercropping. *Frontiers in microbiology* 2021, 11, 596472. <https://doi.org/10.3389/fmicb.2020.596472>
33. Salse, J.; Barnard, R. L.; Veneault-Fourrey, C.; Rouached, H. Strategies for Breeding Crops for Future Environments. *Trends in Plant Science* 2023. <https://doi.org/10.1016/j.tplants.2023.08.007>
34. Homulle, Z.; George, T. S.; Karley, A. J. Root Traits with Team Benefits: Understanding Belowground Interactions in Intercropping Systems. *Plant and Soil* 2021, 1–26. <https://doi.org/10.1007/s11104-021-05165-8>
35. Lin, W.; Li, N.; Chen, L.; Wu, Z.; Lin, W.; Shen, L. Effects of Maize and Soybean Interspecific Interactions on Rhizospheric Bacteria Community Structure and Diversity. *Chin. J. Eco Agric* 2022, 30, 26–37. [10.12357/cjea.20210222](https://doi.org/10.12357/cjea.20210222)
36. FU, Z.; Li, Z.; Ping, C.; Qing, D.; Ting, P.; Chun, S.; WANG, X.; LIU, W.; YANG, W.; YONG, T. Effects of Maize–Soybean Relay Intercropping on Crop Nutrient Uptake and Soil Bacterial Community. *Journal of Integrative Agriculture* 2019, 18 (9), 2006–2018. [https://doi.org/10.1016/S2095-3119\(18\)62114-8](https://doi.org/10.1016/S2095-3119(18)62114-8)
37. Zhao, R.; Li, X.; Bei, S.; Li, D.; Li, H.; Christie, P.; Bender, S. F.; Zhang, J. Enrichment of nosZ-type Denitrifiers by Arbuscular Mycorrhizal Fungi Mitigates N<sub>2</sub>O Emissions from Soybean Stubbles. *Environmental Microbiology* 2021, 23 (11), 6587–6602. <https://doi.org/10.1111/1462-2920.15815>
38. Chen, P.; He, W.; Shen, Y.; Zhu, L.; Yao, X.; Sun, R.; Dai, C.; Sun, B.; Chen, Y. Interspecific Neighbor Stimulates Peanut Growth Through Modulating Root Endophytic Microbial Community Construction. *Frontiers in Plant Science* 2022, 13, 830666. <https://doi.org/10.3389/fpls.2022.830666>
39. Vora, S. M.; Joshi, P.; Belwalkar, M.; Archana, G. Root Exudates Influence Chemotaxis and Colonization of Diverse Plant Growth Promoting Rhizobacteria in the Pigeon Pea–Maize Intercropping System. *Rhizosphere* 2021, 18, 100331. <https://doi.org/10.1016/j.rhisph.2021.100331>
40. Li, Q.; Chen, J.; Wu, L.; Luo, X.; Li, N.; Arafat, Y.; Lin, S.; Lin, W. Belowground Interactions Impact the Soil Bacterial Community, Soil Fertility, and Crop Yield in Maize/Peanut Intercropping Systems. *International journal of molecular sciences* 2018, 19 (2), 622. <https://doi.org/10.3390/ijms19020622>
41. Chen, J.; Arafat, Y.; Wu, L.; Xiao, Z.; Li, Q.; Khan, M. A.; Khan, M. U.; Lin, S.; Lin, W. Shifts in Soil Microbial Community, Soil Enzymes and Crop Yield under Peanut/Maize Intercropping with Reduced Nitrogen Levels. *Applied Soil Ecology* 2018, 124, 327–334. <https://doi.org/10.1016/j.apsoil.2017.11.010>
42. Li, L.; Tang, C.; Rengel, Z.; Zhang, F. Chickpea Facilitates Phosphorus Uptake by Intercropped Wheat from an Organic Phosphorus Source. *Plant and Soil* 2003, 248, 297–303. <https://doi.org/10.1023/A:1022389707051>
43. Liao, H.; Li, Y.; Yao, H. Biochar Amendment Stimulates Utilization of Plant-Derived Carbon by Soil Bacteria in an Intercropping System. *Frontiers in Microbiology* 2019, 10, 1361. <https://doi.org/10.3389/fmicb.2019.01361>
44. Zhang, N. N.; Sun, Y. M.; Wang, E. T.; Yang, J. S.; Yuan, H. L.; Scow, K. M. Effects of Intercropping and Rhizobial Inoculation on the Ammonia-Oxidizing Microorganisms in Rhizospheres of Maize and Faba Bean Plants. *Applied Soil Ecology* 2015, 85, 76–85. <https://doi.org/10.1016/j.apsoil.2014.09.008>
45. Zhang, N. N.; Sun, Y. M.; Li, L.; Wang, E. T.; Chen, W. X.; Yuan, H. L. Effects of Intercropping and Rhizobium Inoculation on Yield and Rhizosphere Bacterial Community of Faba Bean (*Vicia Faba* L.). *Biology and Fertility of Soils* 2010, 46, 625–639. <https://doi.org/10.1007/s00374-010-0469-5>
46. Song, Y.; Marschner, P.; Li, L.; Bao, X.; Sun, J.; Zhang, F. Community Composition of Ammonia-Oxidizing Bacteria in the Rhizosphere of Intercropped Wheat (*Triticum Aestivum* L.), Maize (*Zea Mays* L.), and Faba Bean (*Vicia Faba* L.). *Biology and Fertility of Soils* 2007, 44, 307–314. <https://doi.org/10.1007/s00374-007-0205-y>
47. Song, Y.; Zhang, F.; Marschner, P.; Fan, F.; Gao, H.; Bao, X.; Sun, J.; Li, L. Effect of Intercropping on Crop Yield and Chemical and Microbiological Properties in Rhizosphere of Wheat (*Triticum Aestivum* L.), Maize (*Zea Mays* L.), and Faba Bean (*Vicia Faba* L.). *Biology and Fertility of Soils* 2007, 43, 565–574. <https://doi.org/10.1007/s00374-006-0139-9>
48. Mwakilili, A.; Mwaikono, K. S.; Herrera, S. L.; Midega, C.; Magingo, F.; Alsanius, B.; Dekker, T.; Lyantagaye, S. L. Long-Term Maize-Legume Intercropping Shifts Structure and Composition of Soil Microbiome with Potential Impacts on Ecosystem Services and Food Safety. 2021. <https://doi.org/10.21203/rs.3.rs-221776/v1>
49. Yu, R.-P.; Yang, H.; Xing, Y.; Zhang, W.-P.; Lambers, H.; Li, L. Belowground Processes and Sustainability in Agroecosystems with Intercropping. *Plant and Soil* 2022, 476 (1–2), 263–288. <https://doi.org/10.1007/s11104-022-05487-1>
50. Bilyera, N.; Zhang, X.; Duddek, P.; Fan, L.; Banfield, C. C.; Schlüter, S.; Carminati, A.; Kaestner, A.; Ahmed, M. A.; Kuzyakov, Y. Maize Genotype-Specific Exudation Strategies: An Adaptive Mechanism to Increase Microbial Activity in the Rhizosphere. *Soil Biology and Biochemistry* 2021, 162, 108426. <https://doi.org/10.1016/j.soilbio.2021.108426>

51. Mehta, S.; Singh, B.; Patra, A.; Tripathi, A.; Easwaran, M.; Choudhary, J. R.; Choudhary, M.; Aggarwal, S. Maize Microbiome: Current Insights for the Sustainable Agriculture. In *Microbiomes and plant health*; Elsevier, 2021; pp 267–297. <https://doi.org/10.1016/B978-0-12-819715-8.00009-4>
52. Andrews, M.; Andrews, M. E. Specificity in Legume-Rhizobia Symbioses. *International journal of molecular sciences* 2017, 18 (4), 705. <https://doi.org/10.3390/ijms18040705>
53. Becraft, E. D.; Woyke, T.; Jarett, J.; Ivanova, N.; Godoy-Vitorino, F.; Poulton, N.; Brown, J. M.; Brown, J.; Lau, M. C.; Onstott, T. Rokubacteria: Genomic Giants among the Uncultured Bacterial Phyla. *Frontiers in microbiology* 2017, 8, 2264. <https://doi.org/10.3389/fmicb.2017.02264>
54. Jingjing, Y.; Huiqin, G.; Fry, E. L.; Jonathan, R.; Shiming, T.; Ting, Y.; Weibo, R. Plant Roots Send Metabolic Signals to Microbes in Response to Long-Term Overgrazing. *Science of The Total Environment* 2022, 842, 156241. <https://doi.org/10.1016/j.scitotenv.2022.156241>
55. Orata, F. D.; Meier-Kolthoff, J. P.; Sauvageau, D.; Stein, L. Y. Phylogenomic Analysis of the Gammaproteobacterial Methanotrophs (Order Methylococcales) Calls for the Reclassification of Members at the Genus and Species Levels. *Frontiers in microbiology* 2018, 9, 3162. <https://doi.org/10.3389/fmicb.2018.03162>
56. Ma, W.; Du, W.; Gu, K.; Xu, M.; Yin, Y.; Sun, Y.; Wu, J.; Zhu, J.; Guo, H. Elevated CO<sub>2</sub> Exacerbates Effects of TiO<sub>2</sub> Nanoparticles on Rice (*Oryza Sativa* L.) Leaf Transcriptome and Soil Bacteria. *Science of The Total Environment* 2023, 857, 159689. <https://doi.org/10.1016/j.scitotenv.2022.159689>
57. Cheng, J.; Chen, Y.; He, T.; Liao, R.; Liu, R.; Yi, M.; Huang, L.; Yang, Z.; Fu, T.; Li, X. Soil Nitrogen Leaching Decreases as Biogas Slurry DOC/N Ratio Increases. *Applied Soil Ecology* 2017, 111, 105–113. <https://doi.org/10.1016/j.apsoil.2016.12.001>
58. Dedysh, S. N.; Beletsky, A. V.; Ivanova, A. A.; Danilova, O. V.; Begmatov, S.; Kulichevskaya, I. S.; Mardanov, A. V.; Ravin, N. V. Peat-Inhabiting Verrucomicrobia of the Order Methyloacidiphilales Do Not Possess Methanotrophic Capabilities. *Microorganisms* 2021, 9 (12), 2566. <https://doi.org/10.3390/microorganisms9122566>
59. Emmett, B. D.; Lévesque-Tremblay, V.; Harrison, M. J. Conserved and Reproducible Bacterial Communities Associate with Extraradical Hyphae of Arbuscular Mycorrhizal Fungi. *The ISME journal* 2021, 15 (8), 2276–2288. <https://doi.org/10.1038/s41396-021-00920-2>
60. Horner, A.; Browett, S. S.; Antwis, R. E. Mixed-Cropping between Field Pea Varieties Alters Root Bacterial and Fungal Communities. *Scientific reports* 2019, 9 (1), 16953. <https://doi.org/10.1038/s41598-019-53342-8>
61. Palaniyandi, S. A.; Yang, S. H.; Zhang, L.; Suh, J.-W. Effects of Actinobacteria on Plant Disease Suppression and Growth Promotion. *Applied microbiology and biotechnology* 2013, 97, 9621–9636. <https://doi.org/10.1007/s00253-013-5206-1>
62. Afzal, I.; Shinwari, Z. K.; Sikandar, S.; Shahzad, S. Plant Beneficial Endophytic Bacteria: Mechanisms, Diversity, Host Range and Genetic Determinants. *Microbiological research* 2019, 221, 36–49. <https://doi.org/10.1016/j.micres.2019.02.001>
63. Hamedi, J.; Mohammadipanah, F. Biotechnological Application and Taxonomical Distribution of Plant Growth Promoting Actinobacteria. *Journal of industrial microbiology and biotechnology* 2015, 42 (2), 157–171. <https://doi.org/10.1007/s10295-014-1537-x>
64. Ghodhbane-Gtari, F.; Nouiou, I.; Hezbri, K.; Lundstedt, E.; D'Angelo, T.; McNutt, Z.; Laplaze, L.; Gherbi, H.; Vaissayre, V.; Svistoonoff, S. The Plant-Growth-Promoting Actinobacteria of the Genus *Nocardia* Induces Root Nodule Formation in *Casuarina Glauca*. *Antonie Van Leeuwenhoek* 2019, 112, 75–90. <https://doi.org/10.1007/s10482-018-1147-0>
65. Sousa, J. A. de J.; Olivares, F. L. Plant Growth Promotion by Streptomycetes: Ecophysiology, Mechanisms and Applications. *Chemical and Biological Technologies in Agriculture* 2016, 3 (1), 1–12. <https://doi.org/10.1186/s40538-016-0073-5>
66. Agnolucci, M.; Avio, L.; Pepe, A.; Turrini, A.; Cristani, C.; Bonini, P.; Cirino, V.; Colosimo, F.; Ruzzi, M.; Giovannetti, M. Bacteria Associated with a Commercial Mycorrhizal Inoculum: Community Composition and Multifunctional Activity as Assessed by Illumina Sequencing and Culture-Dependent Tools. *Frontiers in Plant Science* 2019, 9, 1956. <https://doi.org/10.3389/fpls.2018.01956>
67. McBride, M. The Family Flavobacteriaceae. In *The Prokaryotes: Other Major Lineages of Bacteria and the Archaea*. (Eds E. Rosenberg, E. DeLong, S. Lory, E. Stackebrandt and F. Thompson) Pp. 643-676. 2014. [https://doi.org/10.1007/978-3-642-38954-2\\_382](https://doi.org/10.1007/978-3-642-38954-2_382)
68. Morriën, E.; Hannula, S. E.; Snoek, L. B.; Helmsing, N. R.; Zweers, H.; De Hollander, M.; Soto, R. L.; Bouffaud, M.-L.; Buée, M.; Dimmers, W. Soil Networks Become More Connected and Take up More Carbon as Nature Restoration Progresses. *Nature communications* 2017, 8 (1), 14349. <https://doi.org/10.1038/ncomms14349>
69. Van Der Heijden, M. G.; Hartmann, M. Networking in the Plant Microbiome. *PLoS biology* 2016, 14 (2), e1002378. <https://doi.org/10.1371/journal.pbio.1002378>
70. Stopnisek, N.; Shade, A. Persistent Microbiome Members in the Common Bean Rhizosphere: An Integrated Analysis of Space, Time, and Plant Genotype. *The ISME Journal* 2021, 15 (9), 2708–2722. <https://doi.org/10.1038/s41396-021-00955-5>



71. Zhang, L.; Zhang, M.; Huang, S.; Li, L.; Gao, Q.; Wang, Y.; Zhang, S.; Huang, S.; Yuan, L.; Wen, Y. A Highly Conserved Core Bacterial Microbiota with Nitrogen-Fixation Capacity Inhabits the Xylem Sap in Maize Plants. *Nature Communications* 2022, 13 (1), 3361. <https://doi.org/10.1038/s41467-022-31113-w>
72. Bray, J. R.; Curtis, J. T. An Ordination of the Upland Forest Communities of Southern Wisconsin. *Ecological monographs* 1957, 27 (4), 326–349. <https://doi.org/10.2307/1942268>
73. Coenye, T.; Vandamme, P. Diversity and Significance of Burkholderia Species Occupying Diverse Ecological Niches. *Environmental microbiology* 2003, 5 (9), 719–729. <https://doi.org/10.1046/j.1462-2920.2003.00471.x>
74. Li, Y.; Pan, F.; Yao, H. Response of Symbiotic and Asymbiotic Nitrogen-Fixing Microorganisms to Nitrogen Fertilizer Application. *Journal of Soils and Sediments* 2019, 19, 1948–1958. <https://doi.org/10.1007/s11368-018-2192-z>
75. Kumar, U.; Nayak, A. K.; Shahid, M.; Gupta, V. V.; Panneerselvam, P.; Mohanty, S.; Kaviraj, M.; Kumar, A.; Chatterjee, D.; Lal, B. Continuous Application of Inorganic and Organic Fertilizers over 47 Years in Paddy Soil Alters the Bacterial Community Structure and Its Influence on Rice Production. *Agriculture, Ecosystems & Environment* 2018, 262, 65–75. <https://doi.org/10.1016/j.agee.2018.04.016>
76. Anzuay, M. S.; Viso, N. P.; Ludueña, L. M.; Morla, F. D.; Angelini, J. G.; Taurian, T. Plant Beneficial Rhizobacteria Community Structure Changes through Developmental Stages of Peanut and Maize. *Rhizosphere* 2021, 19, 100407. <https://doi.org/10.1016/j.rhisph.2021.100407>
77. Sun, B.; Gu, L.; Bao, L.; Zhang, S.; Wei, Y.; Bai, Z.; Zhuang, G.; Zhuang, X. Application of Biofertilizer Containing *Bacillus Subtilis* Reduced the Nitrogen Loss in Agricultural Soil. *Soil Biology and Biochemistry* 2020, 148, 107911. <https://doi.org/10.1016/j.soilbio.2020.107911>
78. Sun, W.; Shahrajabian, M. H.; Cheng, Q. Nitrogen Fixation and Diazotrophs—a Review. *Rom. Biotechnol. Lett* 2021, 26 (4), 2834–2845. doi: 10.25083/rbl/26.4/2834.2845
79. Nouioui, I.; Cortés-Albayay, C.; Carro, L.; Castro, J. F.; Gtari, M.; Ghodhbane-Gtari, F.; Klenk, H.-P.; Tisa, L. S.; Sangal, V.; Goodfellow, M. Genomic Insights into Plant-Growth-Promoting Potentialities of the Genus *Frankia*. *Frontiers in Microbiology* 2019, 10, 1457. <https://doi.org/10.3389/fmicb.2019.01457>
80. Barberán, A.; Bates, S. T.; Casamayor, E. O.; Fierer, N. Using Network Analysis to Explore Co-Occurrence Patterns in Soil Microbial Communities. *The ISME journal* 2012, 6 (2), 343–351. <https://doi.org/10.1038/ismej.2011.119>
81. Berry, D.; Widder, S. Deciphering Microbial Interactions and Detecting Keystone Species with Co-Occurrence Networks. *Frontiers in microbiology* 2014, 5, 219. <https://doi.org/10.3389/fmicb.2014.00219>
82. de Vries, F. T.; Griffiths, R. I.; Bailey, M.; Craig, H.; Girlanda, M.; Gweon, H. S.; Hallin, S.; Kaisermann, A.; Keith, A. M.; Kretzschmar, M. Soil Bacterial Networks Are Less Stable under Drought than Fungal Networks. *Nature communications* 2018, 9 (1), 3033. <https://doi.org/10.1038/s41467-018-05516-7>
83. Jacquiod, S.; Puga-Freitas, R.; Spor, A.; Mounier, A.; Monard, C.; Mougel, C.; Philippot, L.; Blouin, M. A Core Microbiota of the Plant-Earthworm Interaction Conserved across Soils. *Soil Biology and Biochemistry* 2020, 144, 107754. <https://doi.org/10.1016/j.soilbio.2020.107754>
84. Morriën, E.; Hannula, S. E.; Snoek, L. B.; Helmsing, N. R.; Zweers, H.; De Hollander, M.; Soto, R. L.; Bouffaud, M.-L.; Buée, M.; Dimmers, W. Soil Networks Become More Connected and Take up More Carbon as Nature Restoration Progresses. *Nature communications* 2017, 8 (1), 14349. <https://doi.org/10.1038/ncomms14349>
85. Bitocchi, E.; Nanni, L.; Rossi, M.; Bellucci, E.; Papa, R. Exploring Molecular Variation in Maize Landraces from Central Italy; 2010.
86. Bellucci, E.; Benazzo, A.; Xu, C.; Bitocchi, E.; Rodriguez, M.; Alseekh, S.; Di Vittori, V.; Gioia, T.; Neumann, K.; Cortinovis, G. Selection and Adaptive Introgression Guided the Complex Evolutionary History of the European Common Bean. *Nature Communications* 2023, 14 (1), 1908 <https://doi.org/10.1038/s41467-023-37332-z>
87. Cortinovis, G.; Oppermann, M.; Neumann, K.; Graner, A.; Gioia, T.; Marsella, M.; Alseekh, S.; Fernie, A. R.; Papa, R.; Bellucci, E. Towards the Development, Maintenance, and Standardized Phenotypic Characterization of Single-seed-descent Genetic Resources for Common Bean. *Current Protocols* 2021, 1 (5), e133. <https://doi.org/10.1002/cpz1.133>
88. Team, R. D. C. R. A Language and Environment for Statistical Computing. (No Title) 2010.
89. McMurdie, P. J.; Holmes, S. Phyloseq: An R Package for Reproducible Interactive Analysis and Graphics of Microbiome Census Data. *PloS one* 2013, 8 (4), e61217. <https://doi.org/10.1371/journal.pone.0061217>
90. Legendre, P.; Anderson, M. J. Distance-based Redundancy Analysis: Testing Multispecies Responses in Multifactorial Ecological Experiments. *Ecological monographs* 1999, 69 (1), 1–24. [https://doi.org/10.1890/0012-9615\(1999\)069\[0001:DBRATM\]2.0.CO;2](https://doi.org/10.1890/0012-9615(1999)069[0001:DBRATM]2.0.CO;2)
91. Bulgarelli, D.; Garrido-Oter, R.; Münch, P. C.; Weiman, A.; Dröge, J.; Pan, Y.; McHardy, A. C.; Schulze-Lefert, P. Structure and Function of the Bacterial Root Microbiota in Wild and Domesticated Barley. *Cell host & microbe* 2015, 17 (3), 392–403. <https://doi.org/10.1016/j.chom.2015.01.011>
92. Segata, N.; Izard, J.; Waldron, L.; Gevers, D.; Miropolsky, L.; Garrett, W. S.; Huttenhower, C. Metagenomic Biomarker Discovery and Explanation. *Genome biology* 2011, 12, 1–18. <https://doi.org/10.1186/gb-2011-12-6-r60>
93. Paulson, J. N.; Stine, O. C.; Bravo, H. C.; Pop, M. Differential Abundance Analysis for Microbial Marker-Gene Surveys. *Nature methods* 2013, 10 (12), 1200–1202. <https://doi.org/10.1038/nmeth.2658>

94. Ritchie, M. E.; Phipson, B.; Wu, D.; Hu, Y.; Law, C. W.; Shi, W.; Smyth, G. K. Limma Powers Differential Expression Analyses for RNA-Sequencing and Microarray Studies. *Nucleic acids research* 2015, 43 (7), e47–e47. <https://doi.org/10.1093/nar/gkv007>
95. Pérez-Jaramillo, J. E.; Carrión, V. J.; Bosse, M.; Ferrão, L. F.; De Hollander, M.; Garcia, A. A.; Ramírez, C. A.; Mendes, R.; Raaijmakers, J. M. Linking Rhizosphere Microbiome Composition of Wild and Domesticated *Phaseolus Vulgaris* to Genotypic and Root Phenotypic Traits. *The ISME journal* 2017, 11 (10), 2244–2257. <https://doi.org/10.1038/ismej.2017.85>
96. Friedman, J.; Alm, E. J. Inferring Correlation Networks from Genomic Survey Data. *PLoS computational biology* 2012, 8 (9), e1002687. <https://doi.org/10.1371/journal.pcbi.1002687>
